# Supplementary material for: PRMT5 Protects Genomic Integrity during Global DNA Demethylation in Primordial Germ Cells and Preimplantation Embryos
Source: PubMed Central journal article supplement — Mol Cell. 2014 Nov 20;56(4):564–79. doi: 10.1016/j.molcel.2014.10.003 (PMC4250265; doi:10.1016/j.molcel.2014.10.003), 2014-11-20
Supplement: mmc7.pdf [file mmc7.pdf]

# PRMT5 Protects Genomic Integrity during Global DNA Demethylation in Primordial Germ Cells and Preimplantation Embryos

Shinseog Kim,<sup>1,2,3</sup> Ufuk Günesdogan,<sup>1,2,3</sup> Jan J. Zyllicz,<sup>1,2,3</sup> Jamie A. Hackett,<sup>1,2,3</sup> Delphine Cougot,<sup>1,2,3</sup> Siqin Bao,<sup>1,4</sup> Caroline Lee,<sup>1,2,3</sup> Sabine Dietmann,<sup>3</sup> George E. Allen,<sup>1</sup> Roopsha Sengupta,<sup>1,2,3</sup> and M. Azim Surani<sup>1,2,3,\*</sup>

<sup>1</sup>Wellcome Trust/Cancer Research UK Gurdon Institute, University of Cambridge, Tennis Court Road, Cambridge CB2 1QN, UK

<sup>2</sup>Department of Physiology, Development, and Neuroscience, University of Cambridge, Downing Street, Cambridge CB2 3DY, UK

<sup>3</sup>Wellcome Trust/Medical Research Council Stem Cell Institute, University of Cambridge, Tennis Court Road, Cambridge CB2 1QR, UK

<sup>4</sup>College of Life Science, Inner Mongolia University, No. 235 Da Xue Xi Road, Huhhot, Inner Mongolia 010021, China

\*Correspondence: a.surani@gurdon.cam.ac.uk

<http://dx.doi.org/10.1016/j.molcel.2014.10.003>

## SUMMARY

Primordial germ cells (PGCs) and preimplantation embryos undergo epigenetic reprogramming, which includes comprehensive DNA demethylation. We found that PRMT5, an arginine methyltransferase, translocates from the cytoplasm to the nucleus during this process. Here we show that conditional loss of PRMT5 in early PGCs causes complete male and female sterility, preceded by the upregulation of LINE1 and IAP transposons as well as activation of a DNA damage response. Similarly, loss of maternal-zygotic PRMT5 also leads to IAP upregulation. PRMT5 is necessary for the repressive H2A/H4R3me2s chromatin modification on LINE1 and IAP transposons in PGCs, directly implicating this modification in transposon silencing during DNA hypomethylation. PRMT5 translocates back to the cytoplasm subsequently, to participate in the previously described PIWI-interacting RNA (piRNA) pathway that promotes transposon silencing via de novo DNA remethylation. Thus, PRMT5 is directly involved in genome defense during preimplantation development and in PGCs at the time of global DNA demethylation.

## INTRODUCTION

During the mammalian life cycle, two major epigenetic reprogramming events restore the developmental potential toward the totipotent and pluripotent states: in PGCs following their specification at embryonic days (E) 7.25–E12.5 and during preimplantation development at E0.5–E3.5, respectively (Surani et al., 2007). One key component of epigenome resetting is global DNA demethylation, which renders PGCs and early embryos vulnerable to the activation of transposable elements (TEs) that are normally repressed by DNA methylation (Walsh et al., 1998).

Specification of PGCs occurs at E7.25 in response to BLIMP1, PRDM14, and AP2γ, which also initiates epigenetic reprogramming (Magnúsdóttir et al., 2013; Nakaki et al., 2013). Notably, there is comprehensive erasure of histone H3 lysine 9 dimethyl mark (H3K9me2), followed by genome-wide DNA demethylation and erasure of genomic imprints between E8.5–E11.5 (Hajkova et al., 2008, 2002; Seisenberger et al., 2012). Genomic imprints are reestablished during gametogenesis and subsequently play an essential role during development (McGrath and Solter, 1984; Surani et al., 1984). Epigenetic reprogramming and global DNA demethylation without the erasure of imprints also occurs at ~E0.5–E3.5 during development of blastocysts (Borgel et al., 2010).

At the onset of global DNA demethylation in PGCs, PRMT5, a highly conserved arginine methyltransferase, translocates from the cytoplasm to the nucleus at ~E8.5, and during preimplantation development at the ~4-cell stage (Ancelin et al., 2006; Tee et al., 2010). PRMT5 catalyzes the symmetric dimethylation of arginine residues including arginine 3 of the histones H2A and H4 (H2A/H4R3me2s), a repressive histone modification (Brancombe et al., 2001; Pal et al., 2004), and of other diverse nuclear and cytoplasmic substrates. This includes Sm proteins in neural progenitors, which are required for RNA splicing and p53 (Bezzi et al., 2013; Jansson et al., 2008; Zhao et al., 2009). Loss of PRMT5 is early embryonic lethal at ~E6.5, and is essential for the derivation and maintenance of pluripotent ESCs (Tee et al., 2010).

In the germline, PRMT5 interacts with BLIMP1, a key regulator of PGC specification, which may facilitate its nuclear import at ~E8.0, resulting in high levels of H2A/H4R3 methylation in PGCs (Durcova-Hills et al., 2008). At ~E11.5, PRMT5-BLIMP1 translocate back to the cytoplasm with a consequent decrease of H2A/H4R3me2s modification, as DNA methylation reaches basal levels in PGCs (Ancelin et al., 2006). In the zygote, PRMT5 is maternally inherited, followed by activation of embryonic *Prmt5* at the two- to four-cell stage. PRMT5 relocates predominantly to the nucleus in four- to eight-cell-stage embryos (Tee et al., 2010). Thus, PRMT5 resides in the nucleus in early blastomeres at the onset of global DNA demethylation that reaches basal levels in blastocysts at ~E3.5–E4.5 (Smith et al., 2012). PRMT5 relocates back to the cytoplasm when de novo

DNA methylation and maintenance resume in postimplantation epiblast cells.

DNA methylation is important for the repression of TEs, which comprise 40% of the mammalian genome; their overexpression can induce apoptosis and senescence due to their endonuclease activity and random transpositions (Belgnaoui et al., 2006; Wallace et al., 2008). Global erasure of DNA methylation in PGCs and embryos could cause activation of TEs and affect genome integrity (Burns and Boeke, 2012; Walsh et al., 1998). Of note, there is a transient upregulation of TEs at the two-cell stage during the transition from “zygote to embryo” developmental program (Fadloun et al., 2013; Peaston et al., 2004).

In the germline, a key mechanism for the repression of TEs is through Piwi-interacting small RNAs (piRNAs) acting primarily through de novo DNA methylation (Aravin et al., 2008), which is initiated at ~E12.5. Thus, additional mechanisms for the repression of TEs are probably required in early PGCs, and during preimplantation development, to coincide with the comprehensive erasure of DNA methylation.

Here we specifically investigated the role of PRMT5 in PGCs and preimplantation embryos at the onset of DNA demethylation. We found that the H2A/H4R3me2s modification catalyzed by PRMT5 was enriched on the LINE1 and IAP TEs of early PGCs. Consequently, conditional loss of PRMT5 resulted in loss of H2A/H4R3me2s and upregulation of TEs, apoptosis of PGCs, and complete male and female sterility in otherwise viable adults. Similarly, depletion of maternally inherited and zygotic PRMT5 in preimplantation embryos caused an upregulation of IAP. In PGCs, PRMT5 relocates back to the cytoplasm at ~E11.5, where it has a different role in piRNA-mediated silencing of TEs through methylation of PIWI proteins (Vagin et al., 2009). This study demonstrates that nuclear PRMT5 is crucial for suppressing TEs in PGCs and preimplantation embryos at the time of global DNA demethylation.

## RESULTS

### Loss of PRMT5 in PGCs Results in Male and Female Sterility

We previously showed that PRMT5, which is localized in the cytoplasm of all postimplantation cells, translocates to the nucleus following PGC specification at ~E8.0–8.5 onward (Ancelin et al., 2006), which prompted us to examine the role of nuclear PRMT5 during PGC development.

To delete PRMT5 in PGCs, we generated a *Prmt5* conditional allele (*Prmt5<sup>fllox</sup>*) and crossed *Prmt5<sup>fllox/fllox</sup>* mice with *Blimp1-Cre-BAC* transgenic mice (Ohinata et al., 2005) (see Figures S1A–S1D available online), and followed development of *Prmt5* mutant germ cells beyond E8.5 (Figure 1A). We initially found alkaline phosphatase (AP)-positive mutant PGCs in numbers similar to those in control embryos at E8.5 (41 versus 47 at 0–4 somite stage; 81 versus 88 at 5–10 somite stage; Figure S1E). While PRMT5 was still detectable in the majority of mutant PGCs at E8.5 (89% versus 99%; Figure 1B), their levels declined progressively thereafter as they migrated to the gonads. Indeed, PRMT5 was depleted in the majority of mutant PGCs by E10.5 but, as expected, not in the surrounding somatic cells (13% versus 99%; Figure 1B). While the mutant embryos

developed to apparently normal adulthood (Figures S1F and S1G and see below), both males and females were sterile, with significantly smaller testes and ovaries that lacked germ cells (Figure 1C). These observations establish unequivocally that *Prmt5* is essential for the development of PGCs. We set out to investigate why PRMT5 is essential in PGCs after their specification.

### The Histone Modification H2A/H4R3me2s Is Lost in *Prmt5* Mutant PGCs

Next, we established that the enrichment of PRMT5 in the nucleus occurred in most PGCs by ~E8.5 (E7.75, 62%; E8.5, 99%; Figures 1D and S2A), where it persisted as the PGCs migrated and colonized the genital ridge at ~E10.5 (98%; Figures 1D and S2A). PRMT5 relocates back to the cytoplasm after E11.5, and was rarely detected in the nucleus after E11.5 (E11.5, 6%; E12.5, 0.4%; Figures 1D and S2A). Notably, this transient presence of PRMT5 in the PGC nucleus at ~E8.0–E11.0 occurs following erasure of H3K9me2 and coincides with comprehensive epigenetic reprogramming in PGCs, including global DNA demethylation (Hackett et al., 2013).

The translocation of PRMT5 to the nucleus is accompanied by an enrichment of the H2A/H4R3me2s modification in PGCs, which occurs progressively from E8.5 to E10.5, and persists until ~E12.5 in PGCs (E8.5, 51%; E10.5, 83%; Figures 1E and S2B). By contrast, this chromatin modification diminished significantly and rapidly in *Prmt5* mutant PGCs, and was virtually undetectable by E12.5 (E10.75; 49% versus 99%, E12.5; 4% versus 93%, Figure 2A).

Next we examined if the loss of H2A/H4R3me2s in PGCs had an effect on the dynamic changes of other histone modifications during epigenetic reprogramming of PGCs; this includes the loss of H3K9me2 and an increase in the intensity of H3K27me3 (Hajkova et al., 2008). There were no detectable effects however on these modifications on a global level in mutant PGCs at E10.75–E12.5 (Figures 2B, 2C, and S2C). Other histone modifications, including H3K9ac and H3K9me3, were also unchanged in mutant PGCs at E11.5 (Figure S2C). Thus, the loss of PRMT5 in PGCs specifically affects the H2A/H4R3me2s modification, at least on a global level.

### *Prmt5* Mutant PGCs Undergo Apoptosis

As noted above, loss of PRMT5 in PGCs results in complete sterility in both males and females. To determine when precisely mutant PGCs are affected, we first examined the total number of PGCs by AP staining at E11.5, and found that the *Prmt5* mutant PGCs were reduced in both male and female embryos (Figures 3A and S3A). Further analysis using *Blimp1Cre;Prmt5<sup>fllox/-</sup>* mice harboring an *Oct4ΔPE-GFP* reporter gene (GOF) (Yeom et al., 1996) showed that 87% of the mutant PGCs had lost PRMT5 by E10.5 (Figure 1B). Moreover, flow cytometry analysis for GOF-positive cells revealed a reduction in the number of *Prmt5* mutant PGCs to 59% compared to those in control littermates at E11.5 (399 versus 682;  $n = 10$ ,  $n = 25$  embryos,  $p < 0.05$ ) (Figure 3B). By E15.5–E16.5, none of the *Prmt5* mutant PGCs survived in either male or female embryos (Figures 3C and 3D), or in the postnatal testis (9 dpp and 6 weeks; Figures S3B–S3D). However, the somatic cells formed apparently normal

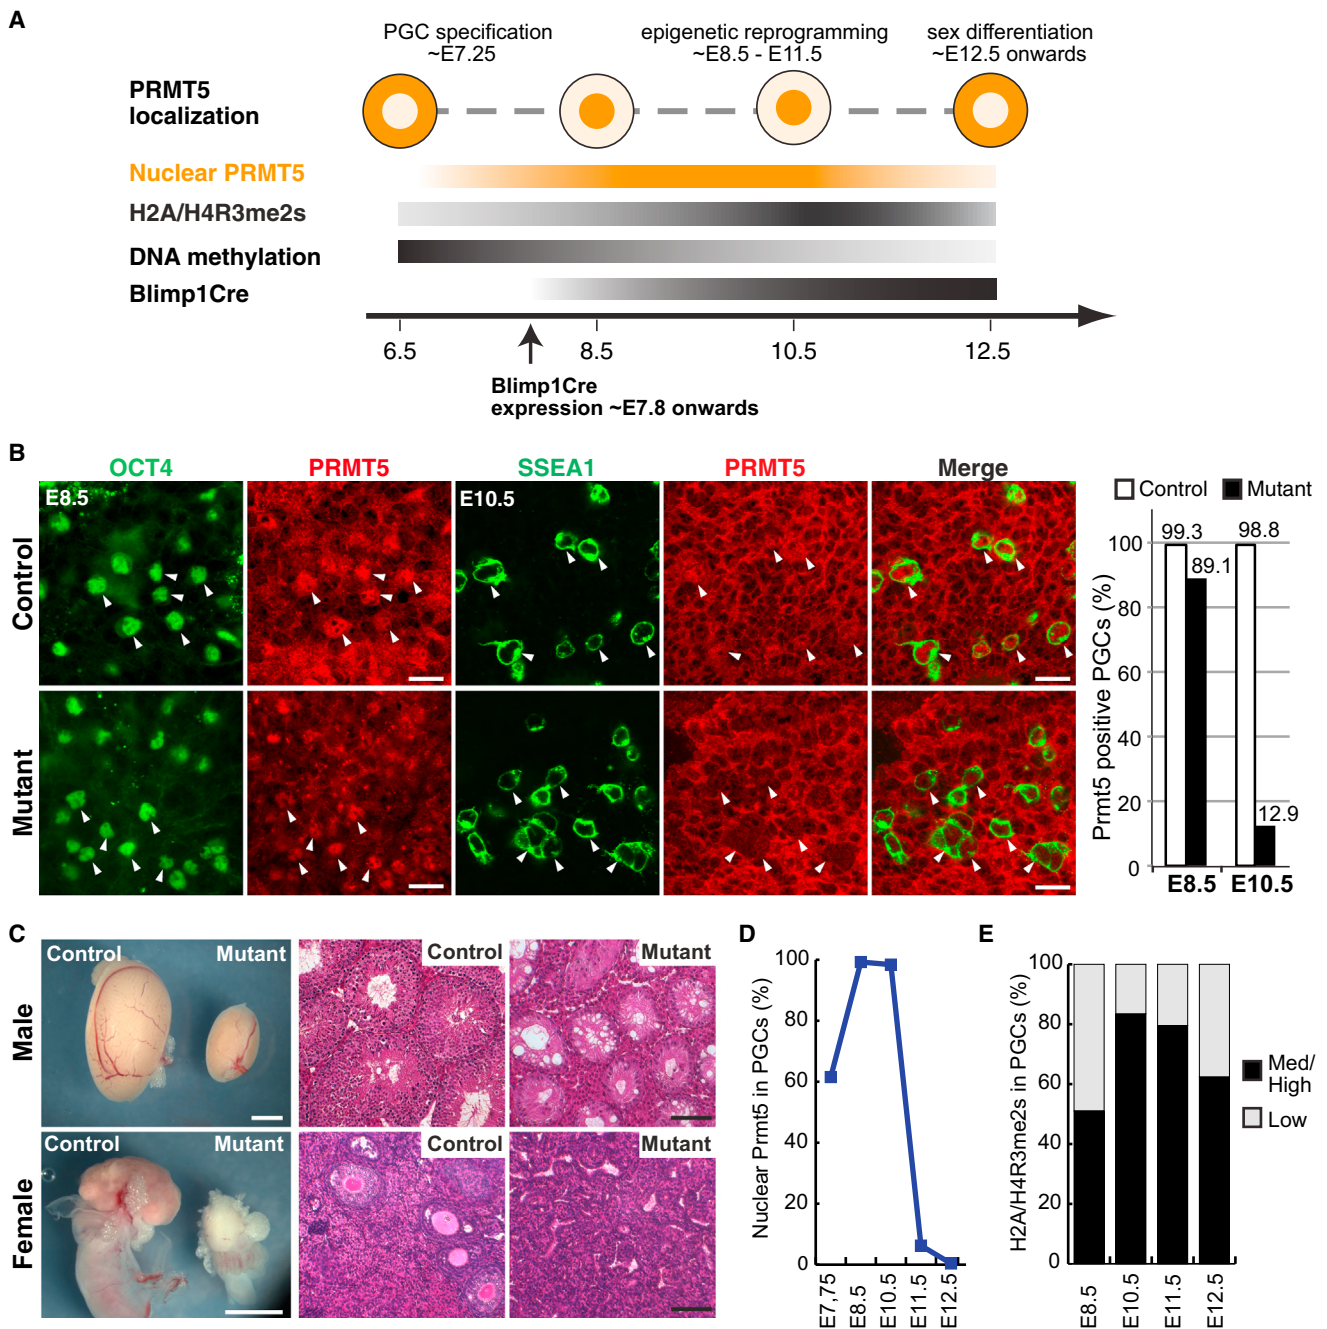

**Figure 1. Deletion of *Prmt5* in the Germline using *Blimp1-Cre* Results in Male and Female Sterility**

(A) A schematic of PGCs development (E6.5–E12.5) represents the following: nuclear-cytoplasmic translocation of PRMT5, increase of H2A/H4R3me2s modification, progressive erasure of DNA methylation, and the initiation of *Blimp1-Cre* expression to induce deletion of nuclear *Prmt5*.

(B) Detection of PRMT5 (red) by immunofluorescence (IF), and of the PGC markers OCT4 (E8.5; green) or SSEA1 (E10.5; green) in genital ridges. Right graph shows the number of PRMT5-positive PGCs (% PRMT5-positive/PGC marker-positive cells). At E8.5, 89% of mutant PGCs were PRMT5 positive (57/64), and at E10.5 13% of mutant PGCs were PRMT5 positive (9/70). Scale bar, 20  $\mu$ m. The arrowheads mark PGCs.

(C) (Left panel) Testis and ovary from adult mutants (right) are considerably smaller than from control littermate (left). Scale bar, 2 mm. (Right panel) Hematoxylin and eosin staining of sections from adult testis and ovary shows a lack of sperm and oocytes in mutants. Scale bar, 100  $\mu$ m. The genotype of the control is *Blimp1Cre;Prmt5<sup>fllox/+</sup>* and the mutant is *Blimp1Cre;Prmt5<sup>fllox/-</sup>* in (B) and (C).

(D) The number of PGCs (in %) with nuclear PRMT5 detected by IF at E7.5–E12.5 in wild-type embryos.

(E) The number of PGCs with similar or higher level of H2A/H4R3me2s detected by IF (Med/High, black, in %) in PGCs compared to surrounding somatic cells at E8.5–E12.5.

See also Figures S1 and S2.

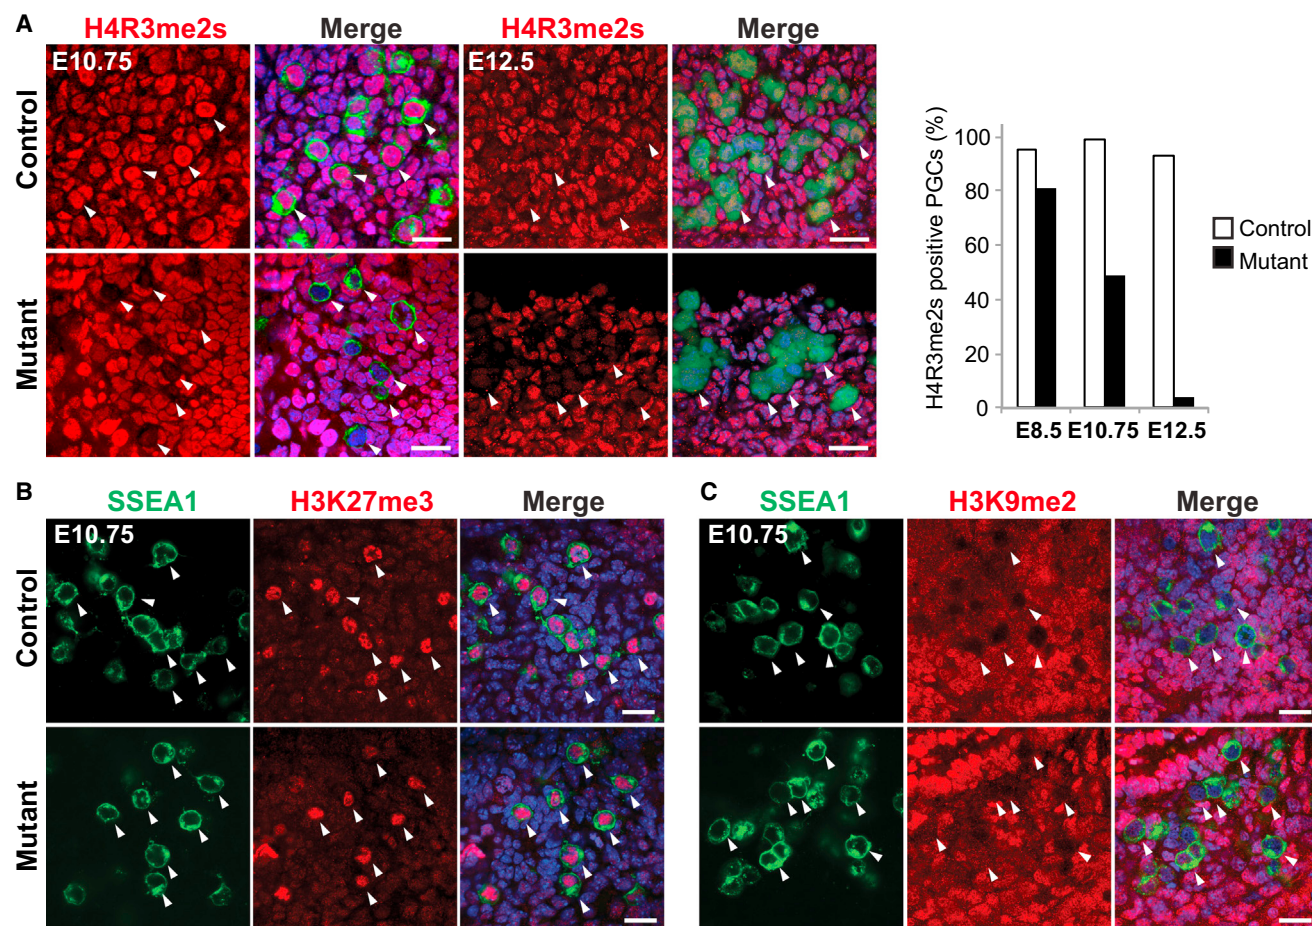

**Figure 2. Loss of *Prmt5* in the Germline Results in Loss of H2A/H4R3me2s**

(A) IF staining of genital ridges for H2A/H4R3me2s (red). PGCs were detected with antibodies against SSEA1 (green, E10.75) or GFP for GOF (green, E12.5). Merged images are shown with DNA stained with DAPI (blue). (Right graph) Number of PGCs labeled with H2A/H4R3me2s (in %). At E8.5, 81% (21/26) of mutant PGCs were H2A/H4R3me2s positive, which were reduced to 49% (50/102) at E10.75, and at E12.5 there were 4% (3/74) mutant PGCs that were positive for H2A/H4R3me2s.

(B) IF staining of H3K27me3 (red) in genital ridges at E10.75. PGCs were detected with SSEA1 antibody (green).

(C) IF staining of H3K9me2 (red) in genital ridges at E10.75 shows a lack of this modification in PGCs. PGCs were detected with SSEA1 antibody (green). Scale bar, 20  $\mu$ m in (A)–(C). The arrowheads in (A)–(C) indicate examples of PGCs. The genotype of the control is *Blimp1Cre;Prmt5<sup>flax/+</sup>*, and the mutant is *Blimp1Cre;Prmt5<sup>flax/-</sup>* in (A)–(C).

See also Figure S2.

seminiferous tubules in males (Figures 1C and S3B). Thus, the loss of mutant PGCs coincides with the rapid loss of H2A/H4R3me2s modification from the nucleus of *Prmt5* null PGCs from ~E10.75 onward.

To determine the cause of the loss of PGCs in PRMT5 mutants, we examined the rate of cell proliferation and cell death at E11.5 by immunostaining of phosphorylated histone H3 Ser10 (H3S10ph), a marker of mitosis. This showed 5% of the PGCs were positive in control embryos (18/344) compared to 19% (22/113) in *Prmt5* mutants (Figure 3E). Further, we stained for the proliferation marker Ki67 nuclear antigen, which is enriched in S, G2, and M phases but low in G0 and G1 (Gerdes et al., 1984). This showed that 44% (29/66) of mutant PGCs have low Ki67 staining compared to 19% (29/157) of control germ cells (Figure 3F). These results suggest that relatively

more *Prmt5* mutant germ cells are in G0/G1 phase or arrested in cell cycle. The small number of surviving mutant PGCs progress through the cell cycle asynchronously, which prevents detailed analysis. Nevertheless, these combined data suggest that there is a heterogeneous population of *Prmt5* mutant PGCs with defects in cell-cycle regulation.

Next, we analyzed the rate of cell death by TUNEL labeling, which showed that a greater number of mutant PGCs were undergoing apoptosis from E11.5 onward compared to controls (15% versus 0%; Figure 3G). Consistently, live imaging for 24 hr of genital ridges ex vivo from E11.5 control and *Prmt5* mutant embryos with the GOF reporter transgene revealed that the number of mutant PGCs declined progressively as they fragmented and disappeared (Figures 3H and S3E; Movie S1 and Movie S2). Taken together, these results suggest that the loss

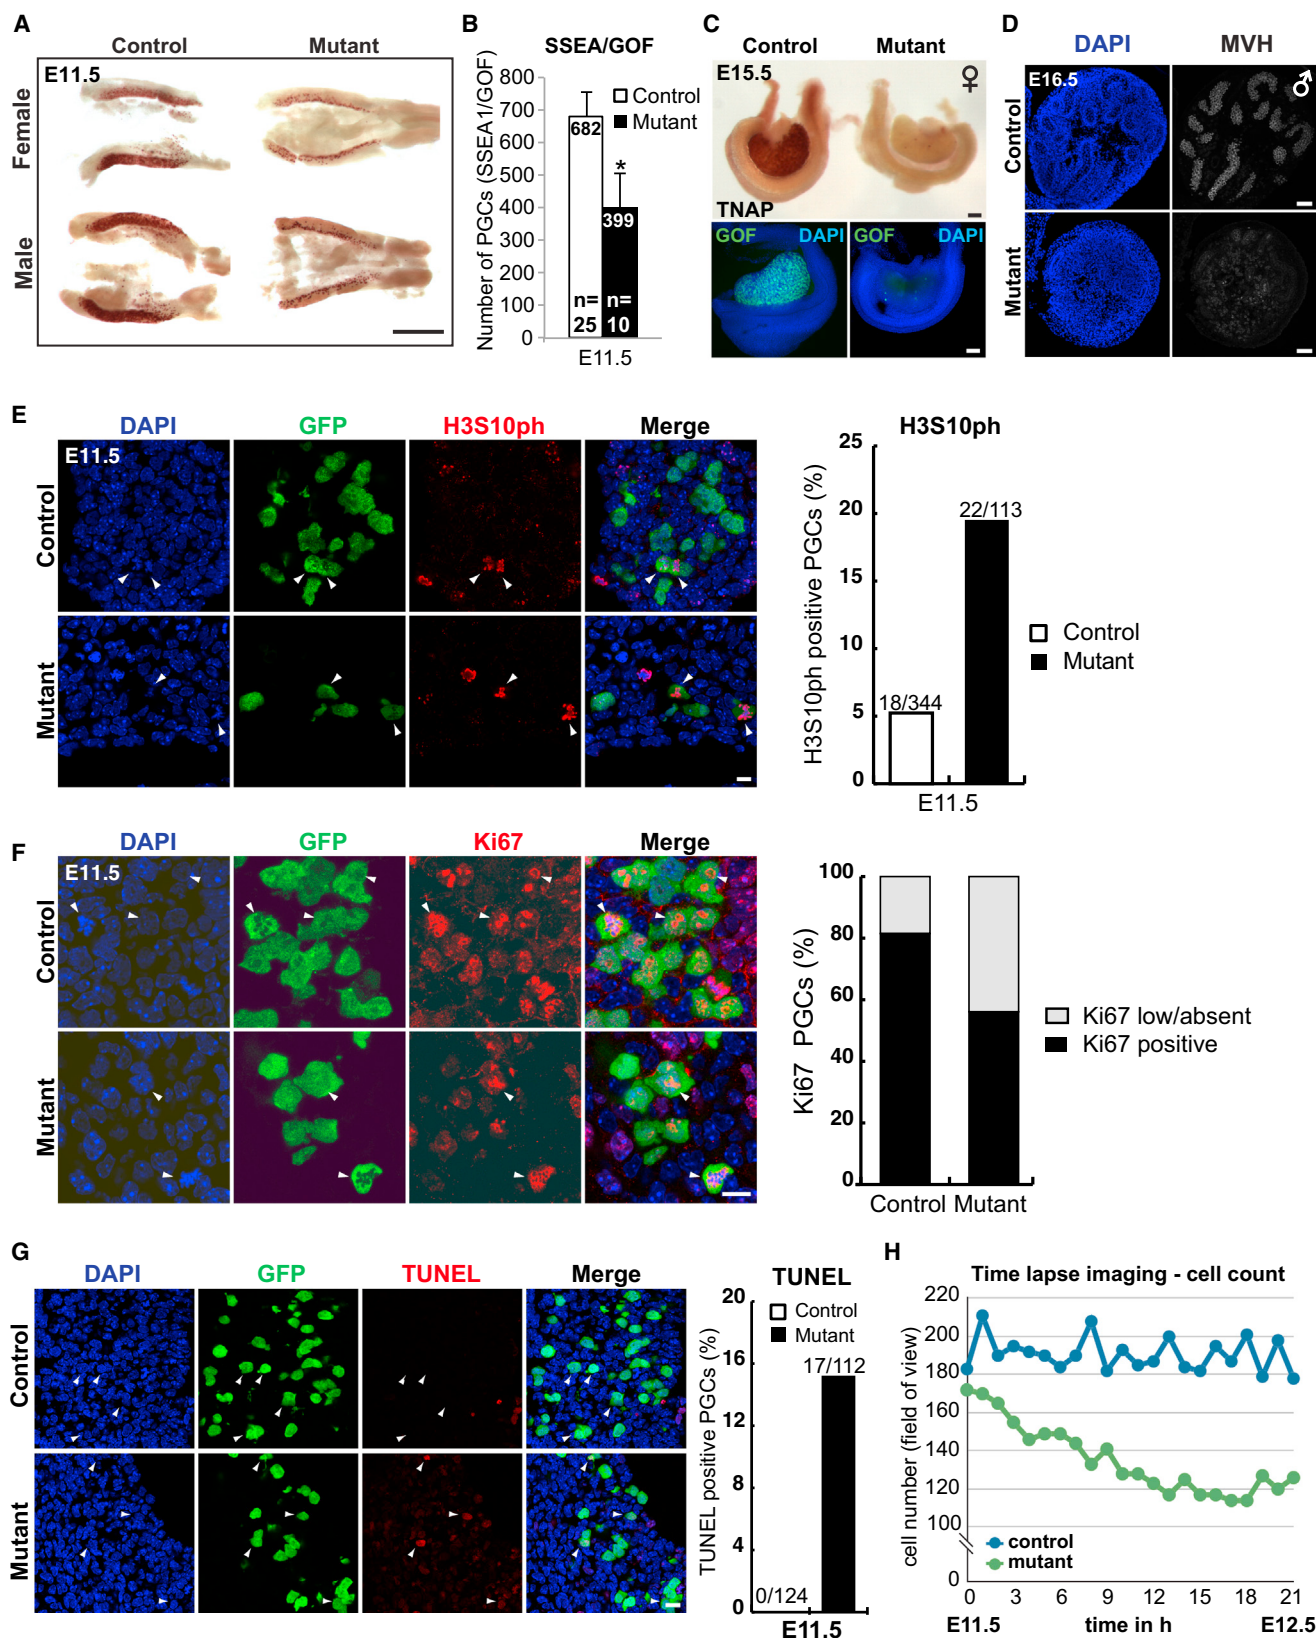

(legend on next page)

of PGCs in *Prmt5* mutants is caused by apoptosis and cell-cycle deregulation.

### DNA Damage Response Genes Are Upregulated in *Prmt5* Mutant PGCs

To determine the consequences of the loss of H2A/H4R3me2s modification in *Prmt5* mutant PGCs, we analyzed their transcriptome by microarrays at E11.5. Surprisingly, only 32 out of 22,166 probes showed significant differential gene expression changes (*adj.p* < 0.05) (Table S1). We sought more comprehensive information by performing RNA-Seq analysis on control and mutant PGCs at E11.5 (Tang et al., 2010). Again, we found that only 422 genes were differentially expressed (*p* < 0.05), among which 201 genes were upregulated (>1.24-fold) and 221 were downregulated (<0.82-fold) (Table S2). Notably, we detected upregulation of the p53 signaling genes (*Cdkn1a*, *Mdm2*, *Ccng1*) and DNA damage response genes (*Ercc5*, *Btg2*, *Rev1*) in the *Prmt5* mutant PGCs (Figure 4A; Table S1 and Table S2), while the downregulated genes were categorized to RNA processing (*Prpf31*, *Exosc2*, *Zranb2*) and DNA metabolic process (*Fbxo18*, *Recql*, *Lig3*). Gene ontology (GO) and Kyoto Encyclopedia of Genes and Genomes (KEGG) analysis showed upregulation of peptidase regulator activity, DNA damage response, and p53 class mediators, as well as of the spliceosome complex in *Prmt5* mutant PGCs (Figures S4A and S4B). The splicing defects and the activation of the p53-signaling pathway upon loss of PRMT5 are consistent with the observations in other cell types such as neural progenitor cells (Bezzi et al., 2013; Figure S4E). We validated the microarray and the RNA-Seq results by quantitative RT-PCR (qPCR) for selected genes in E11.5 PGCs (Figure 4B). Importantly, some key germline genes, including *POU5F1* (*Oct4*) and *Dppa3* (*stella*) were not affected in *Prmt5* mutant PGCs (Figures 4B and S4C; Table S1 and Table S2), which we confirmed by immunostaining for OCT4, VASA, and DAZL (Figures 4C and 4D). Collectively, these results indicate that among the key effects of loss of PRMT5 in PGCs is the induction of DNA damage response and p53 signaling genes, which is consistent with their apoptotic response. Of note, the loss of the repressive H2A/H4R3me2s modification did not result in a global deregulation of transcription in PGCs.

### Transposable Elements Are Upregulated in *Prmt5* Mutant PGCs

PGCs are likely to be vulnerable to the expression of TEs, especially during major epigenetic changes, including global DNA demethylation and the loss of H3K9me2, both of which are involved in the repression of TEs (Di Giacomo et al., 2013; Hajkova et al., 2002). Overexpression of TEs can have major genome-destabilizing effects in association with abnormal cell-cycle progression (Belgnaoui et al., 2006). TEs-induced mutations could also be detrimental for subsequent development, especially if it occurs repeatedly during the subsequent germline cycles. As *Prmt5* mutant PGCs showed upregulation of DNA damage-response genes, we examined the RNA-Seq data of E11.5 PGCs and found that IAP-LTR1 is one of the most highly upregulated TEs in *Prmt5* mutant PGCs (Figure 5A; Table S3). IAP-LTR1 is among the most active and abundant class of IAP elements whose expression can compromise genome integrity through random mutations following transpositions (Qin et al., 2010).

Since the PGC population is developmentally heterogeneous, and the H2A/H4R3me2s modification is lost in ~49% of mutant PGCs by E10.75, we examined the expression of TEs by qRT-PCR analysis on single-cell cDNAs from PGCs. Remarkably, despite the heterogeneity of expression levels of TEs in single PGCs, the bulk of *Prmt5* mutant PGCs at E11.5 showed an ~3-fold upregulation of IAP-LTR (*p* < 0.05). This suggests that among the mutant PGCs, some of them have very high levels of IAP-LTR expression. In addition, the open reading frame (ORF)2 of LINE-1 which encodes an endonuclease and a reverse transcriptase showed ~5-fold higher expression in mutant PGCs (*p* < 0.05) compared to controls (Figure 5B). The LINE-1 5' UTR and IAP-GAG were apparently not significantly affected, which may be due to technical reasons following the generation of 3' biased cDNAs during single-cell reverse transcription amplification (Tang et al., 2010). The expression of short interspersed nonrepetitive elements B1 (SINE-B1) was also seemingly not affected (*p* = 0.85; Figure 5B). Notably, in E12.5 PGCs, we detected a 6-fold increase of LINE-1 ORF2 in E12.5 mutant PGCs (Figure S5A). However, the levels of IAP-GAG seemed to be less affected, probably owing to the heterogeneity among mutant cells such that the surviving E12.5 mutant PGCs might represent a minor population that have yet to exhibit the effects

### Figure 3. *Prmt5* Mutant PGCs Undergo Apoptosis

- (A) Staining of E11.5 genital ridges for alkaline phosphatase (AP, seen as brown), a marker of PGCs. Scale bar, 0.5 mm.
- (B) The number of PGCs at E11.5 determined by flow cytometry for SSEA1/GOF-positive cells. Shown are the mean values  $\pm$  SE (Student's *t* test, \**p* < 0.05).
- (C) AP staining (top) and IF staining of GFP (bottom) in E11.5 female gonads. Merged images are shown with DNA stained with DAPI (blue) and PGCs stained with GFP (for GOF transgene, green). Note a lack of mutant germ cells in the gonads. Scale bar, 100  $\mu$ m.
- (D) IF staining of the late germ cell marker MVH (mouse vasa homolog, white) shows a lack of staining in E16.5 male mutant PGCs in gonads (bottom right hand panel). Scale bar, 50  $\mu$ m.
- (E) IF staining for the mitosis marker H3S10ph (red) in genital ridges at E11.5. PGCs are costained with antibodies against GFP that recognizes GOF (green). Scale bar, 10  $\mu$ m. The number of PGCs that were labeled for H3S10ph is shown on the right (in %).
- (F) IF staining for the mitosis marker Ki67 (red) in genital ridges at E11.5. PGCs are costained with GFP antibody that recognizes GOF (green). Scale bar, 10  $\mu$ m. The number of PGCs in control and *Prmt5* mutant embryos (in %) that were positive for Ki67 are shown in black; cells with low or no staining are shown in gray.
- (G) TUNEL assay (red) to visualize apoptosis in genital ridges at E11.5. Scale bar, 10  $\mu$ m. PGCs were costained with antibodies against GFP for GOF transgene (green). The number of PGCs that were labeled in the TUNEL assay are shown on the right (in %). The arrowheads in (E) and (F) indicate examples of PGCs.
- (H) GFP-positive PGCs in the field of view during ~24 hr time-lapse imaging of E11.5 genital ridges. Note a steady decline in the number of mutant PGCs (green) compared to controls (blue), in which the numbers fluctuated but did not change significantly. The genotype of the control is *Blimp1Cre;Prmt5<sup>flox/+</sup>* and the mutant is *Blimp1Cre;Prmt5<sup>flox/-</sup>* in (A)–(H).

See also Figure S3, Movie S1 (Mutant), and Movie S2 (Control).

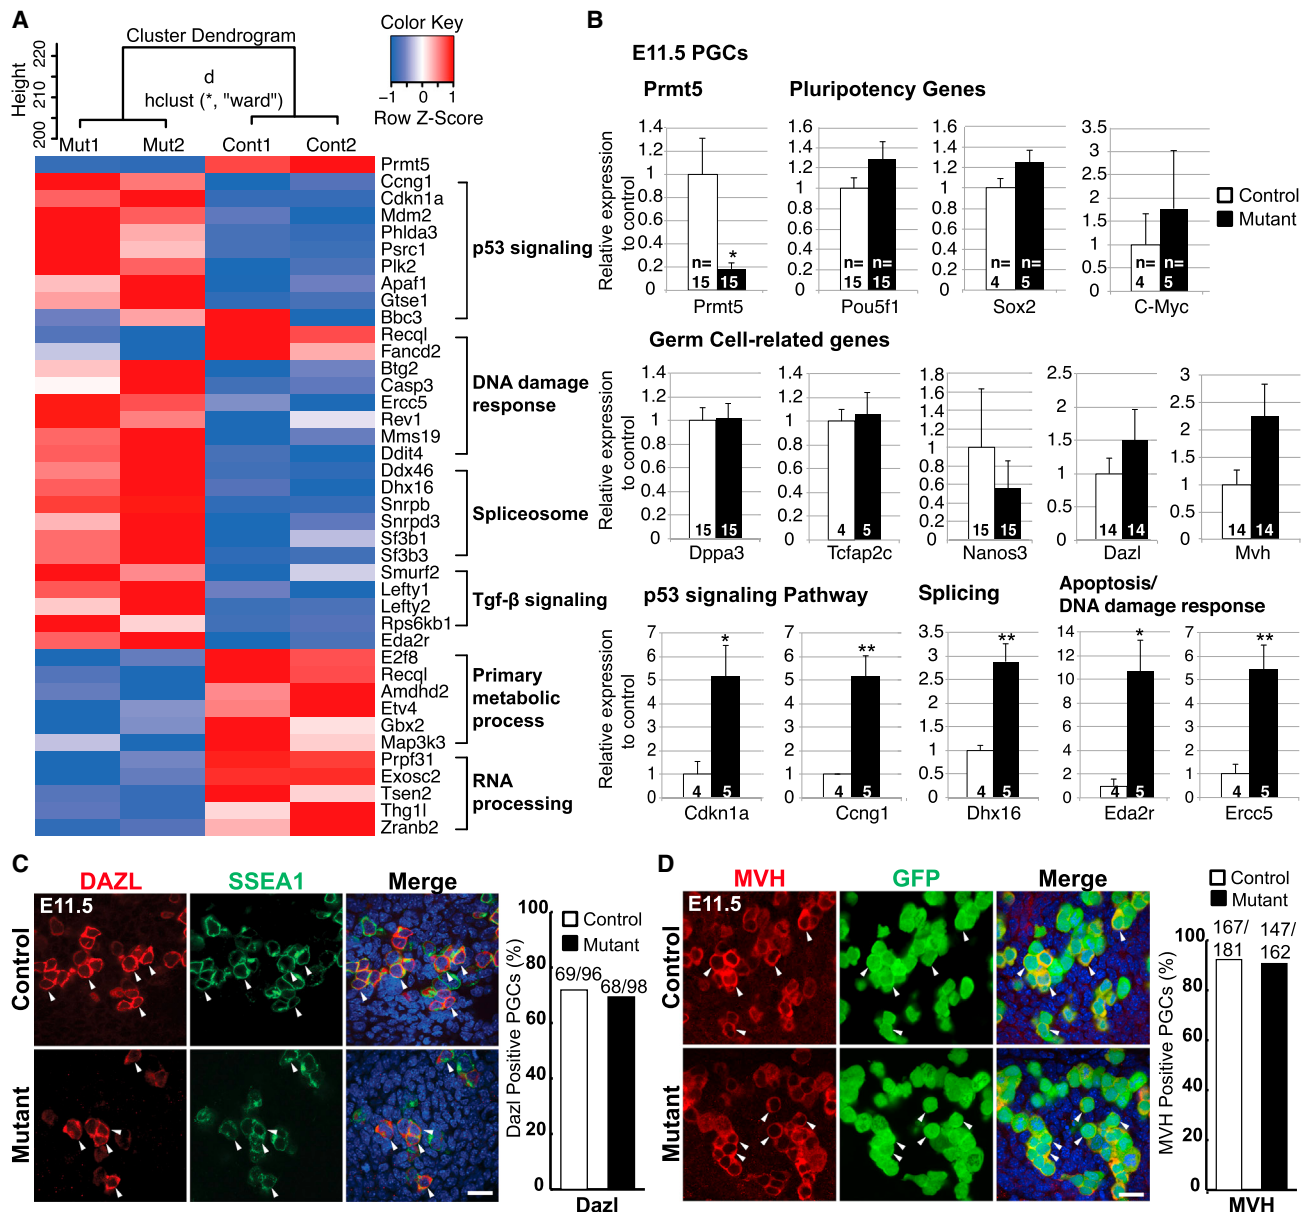

**Figure 4. The Loss of PRMT5 in PGCs Induces p53 Signaling and DNA Damage Response Genes**

(A) A heatmap of selected up- and downregulated genes in E11.5 PGCs from RNA-Seq analysis. Cluster dendrogram for two biological replicates of each genotype is shown on top. Note that p53 signaling genes and DNA damage response genes are upregulated (red) in the mutant, while primary metabolic process and RNA processing genes are downregulated (blue).

(B) qRT-PCR analysis of selected genes in E11.5 PGCs (control, white; mutant, black). Shown are the mean values  $\pm$  SE. Significance is shown by Student's *t* test: \*\**p* < 0.01, \**p* < 0.05.

(C) IF staining of DAZL (late germ cell marker, red) in genital ridges at E11.5. PGCs were detected with antibodies against SSEA1 (green). Merged images are shown with DNA stained with DAPI (blue). The ratio of DAZL-positive PGCs in SSEA1-positive PGCs (in %) was determined (controls, white; mutants, black). (D) IF staining of MVH (late germ cell marker, red) in genital ridges at E11.5. The ratio of MVH-positive PGCs in GFP positive (green) PGCs (in %) was determined. Scale bar, 20  $\mu$ m in (C) and (D). The arrowheads in (C) and (D) indicate examples of PGCs. The genotype of the control is *Blimp1Cre;Prmt5<sup>fllox/+</sup>*, and the mutant is *Blimp1Cre;Prmt5<sup>fllox/-</sup>* in (A)–(D).

See also Figure S4 and Table S2.

of the *Prmt5* mutation (Figure S5A). Indeed, the development of individual PGCs does not occur synchronously, within or between embryos.

Next, we looked for the presence of L1ORF1p and IAP-GAG proteins by immunostaining of E11.5 PGCs with specific antibodies. This showed a significant increase in the levels of

L1ORF1p in a substantial number of *Prmt5* mutant PGCs compared to the control (71% versus 10%; Figure 5C). The levels of L1ORF1p expression in *Prmt5* mutant PGCs increased progressively from E10.5 to E12.5 (Figure 5C). In addition, IAP-GAG was more abundant in mutant PGCs at E11.5 (56% versus 23%; Figure 5D) and in surviving mutant germ cells at E12.5. Wild-type PGCs rarely expressed detectable levels of IAP-GAG (Figure 5D). This shows that both the IAP and LINE-1 elements are derepressed in mutant PGCs, which coincides with the progressive loss of the H2A/H4R3me2s modification.

To test whether this upregulation of TEs expression and proteins has any consequence, we stained E12.5 genital ridges for  $\gamma$ H2AX, which is a marker for DNA double-strand breaks. We found that the mutant PGCs that contained bright and greater number of  $\gamma$ H2AX nuclear foci compared to control (Figure S5B). Accordingly, the mean intensity of  $\gamma$ H2AX in mutant GFP-positive PGCs was 1.3-fold higher than in control. Combined with the upregulation of DNA damage response genes in mutant PGCs, this result suggests that the upregulation of TEs may cause DNA lesions in *Prmt5* mutant germ cells (Figures S4A and S5B).

We asked if the loss of PRMT5 has an effect on DNA methylation of repetitive elements in PGCs. While the global erasure of DNA methylation in PGCs reaches basal levels by E13.5, some repetitive elements such as IAP are only partially demethylated (Hackett et al., 2013). There was little effect on the status of DNA methylation of IAP and LINE1 elements in *Prmt5* mutant PGCs by bisulphite genomic sequencing of E11.5 PGCs, except for a slightly higher extent of demethylation of IAP in mutant compared to wild-type PGCs (average level 76% versus 81%;  $n = 5$ , Figure 5E). There was no reduction in DNA methylation of LINE1 in *Prmt5* mutant PGCs, suggesting that the loss of DNA methylation was not a major cause for the elevation of IAP and LINE-1 expression (Figure 5E). Indeed, the expression of LINE1 was not upregulated despite high levels of demethylation in wild-type PGCs. There was also no detectable effect on the expression of DNA methyltransferase 1 (DNMT1) in *Prmt5* mutant PGCs at E11.5 (Figure S5C). This indicates a lack of significant correlation between overall changes in DNA methylation levels and the expression of LINE1 and IAP, which is also not due to any additional loss of DNA methylation from these elements in *Prmt5* mutant PGCs. This supports the possibility that the translocation of PRMT5 from the cytoplasm to the nucleus at  $\sim$ E8.5, and the associated H2A/H4R3me2s modification detected in the PGC nuclei, might have a role in the repression of LINE1 and IAP.

### H2A/H4R3me2s Is Enriched at IAP and LINE-1 in PGCs

The enrichment of the H2A/H4R3me2s repressive modification in PGCs might have a specific role in the repression of TEs, as this mark is generally implicated in gene repression (Xu et al., 2010). This modification was detected by immunofluorescence, concomitantly with the translocation of PRMT5 to the nucleus at  $\sim$ E8.5 in PGCs (Figures 1D, 1E, S2A, and S2B).

To check for the presence of the H2A/H4R3me2s modification on TEs, we carried out chromatin immunoprecipitation (ChIP) analysis for this mark on LINE1 and IAP in PGCs. Indeed, we found that both LINE1 and IAP are enriched for the H2A/

H4R3me2s modification at E10.5–E11.5 in PGCs (Figure 5F). Subsequently, it is lost in male PGCs at E13.5 following translocation of PRMT5 to the cytoplasm at  $\sim$ E11.5. The specificity of this modification was evident by comparison with the negative control regions at the *Oct4* and *Nanog* loci with a highly diminished signal. Further, LINE1 and IAP are not enriched for the modification in male PGCs at E13.5. It is technically not possible to similarly analyze *Prmt5* mutant PGCs due to their extremely low numbers ( $\sim$ 400 PGCs/embryo at E11.5, Figure 3B). We did not, however, detect the H2A/H4R3me2s modification in mutant PGCs by immunofluorescence at E12.5 (Figure 2A), which indirectly implicates the loss of this modification on TEs. The combined data indicate that the enrichment of H2A/H4R3me2s modification in PGCs coincides with the entry of PRMT5 into the nucleus during global DNA demethylation in  $\sim$ E8.5–E11.5 PGCs. Notably, the H2A/H4R3me2s enrichment on LINE1 and IAP precedes expression of piRNAs and PIWI proteins in male germ cells at E12.5–E15.5 (Aravin et al., 2008; Kuramochi-Miyagawa et al., 2004). As discussed later, loss of cytoplasmic PRMT5 in early postimplantation epiblast has a negligible effect on TE expression owing to the resumption of DNA methylation in these cells (see later).

In summary, the loss of H2A/H4R3me2s in *Prmt5* mutant PGCs occurs at E10.5–E11.5 followed by upregulation of LINE1 and IAP elements at E11.5–E12.5 (Figures 2A and 5B–5D). Our results suggest that PRMT5 and the histone modification H2A/H4R3me2s are required for the suppression of TEs during extensive reprogramming, including loss of H3K9me2 and global DNA demethylation in PGCs.

### PRMT5 Represses Transposable Elements during Preimplantation Development

In principle, it is possible that PRMT5 might have a similar role elsewhere during global DNA demethylation of the genome. We took the opportunity to test this idea during another major epigenetic reprogramming event through development of the mouse zygote to the blastocyst stage, which is accompanied by global DNA demethylation (Smith et al., 2012). Our observation on PGCs prompted us to examine the role of maternally inherited and zygotic PRMT5 during preimplantation development (Tee et al., 2010).

In preimplantation embryos, PRMT5 is present in the cytoplasm of the zygote and two-cell-stage embryos, but it localizes to the nucleus at the four- to eight-cell stage and persists there until the early E3.5 blastocyst stage (Figure 6A). Concomitantly with the nuclear localization of PRMT5, we could detect enrichment of H2A/H4R3me2s in the nucleus, particularly in eight- to sixteen-cell-stage embryos; prior to this, there are relatively low levels of this modification detectable at the two-cell stage (Figure S6A). Thereafter, PRMT5 is mostly cytoplasmic in the  $\sim$ E4.5 epiblast cells of developing embryos, concurrently with the initiation of de novo DNA methylation in epiblast cells, although it remains in the nucleus of trophectoderm (TE) cells that are relatively hypomethylated (Chapman et al., 1984).

We had previously shown that embryonic development following the loss of zygotic PRMT5 after an intercross between *Prmt5*<sup>+/-</sup> mice, was morphologically indistinguishable from wild-type E3.5 blastocysts (Tee et al., 2010). Consistently,

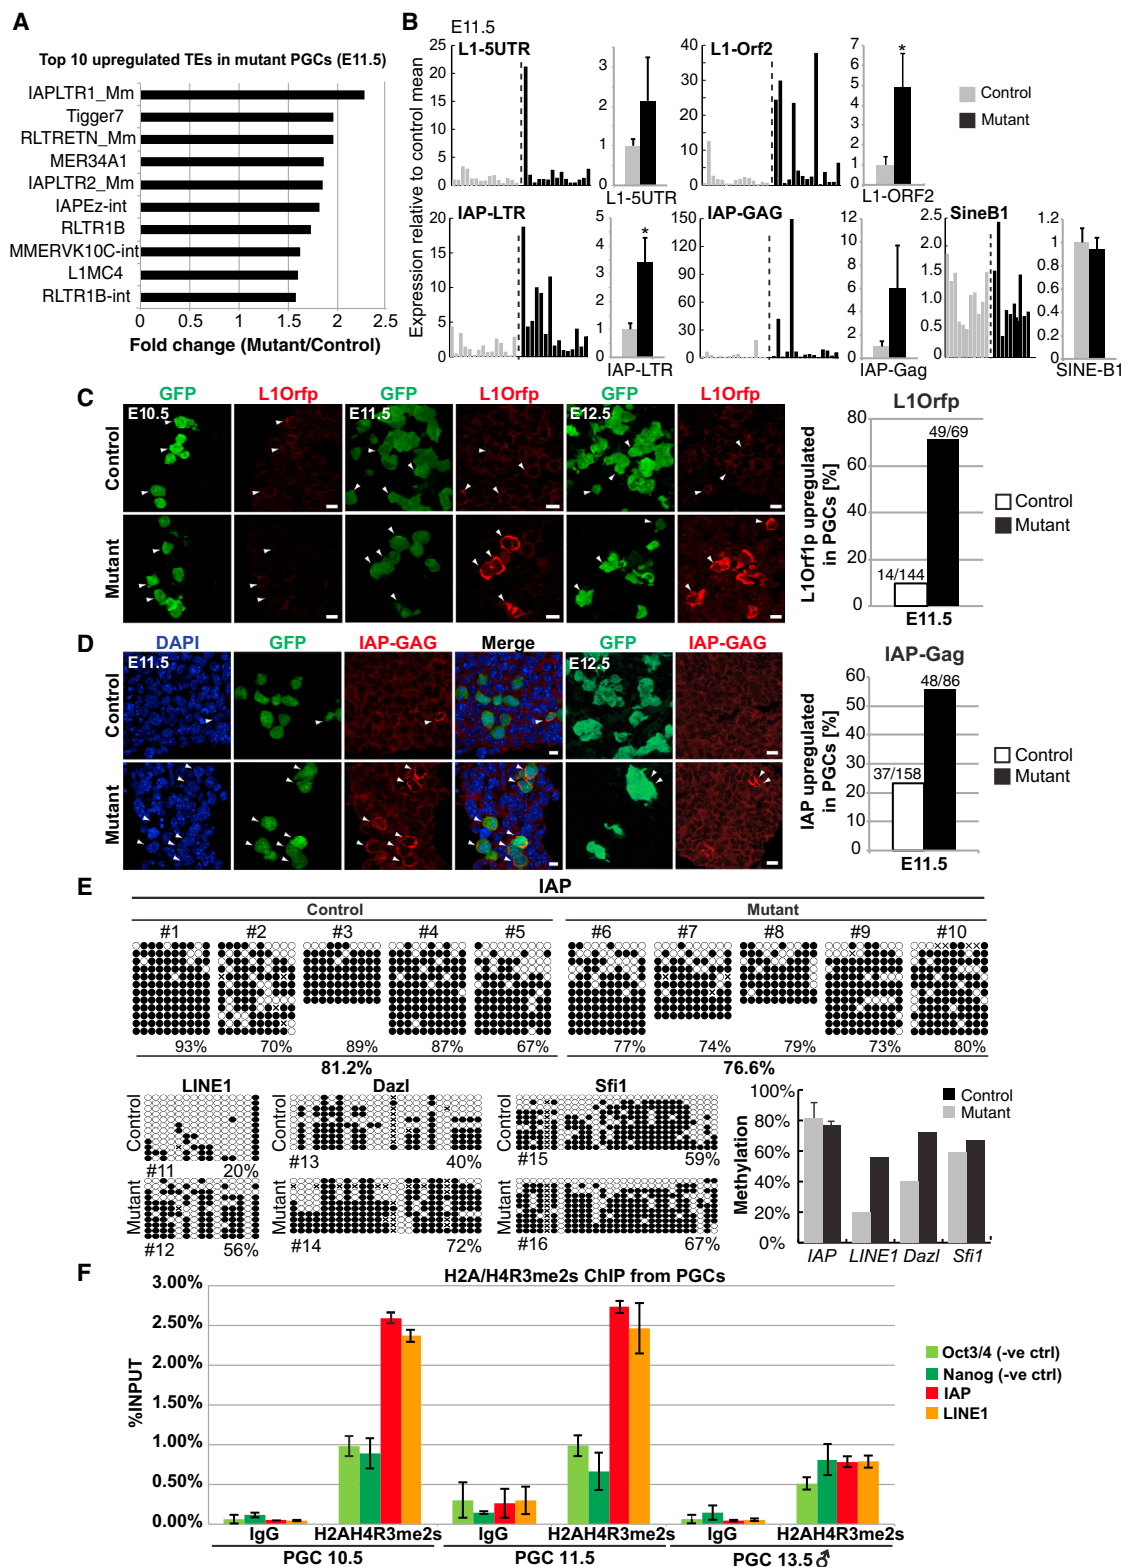

**Figure 5. Transposable Elements Are Upregulated in the Absence of PRMT5 in PGCs**

(A) Top ten upregulated TEs in E11.5 mutant PGCs identified in the RNA-seq analysis. Mutant PGC values were compared to control PGC values and are shown as fold change (Mutant/Control).

(legend continued on next page)

zygotic *Prmt5* mutant blastocysts have OCT4-positive cells in the inner cell mass (ICM) and CDX2-positive TE cells (Figure S6B). Notably, there were no significant changes in the expression of IAP and LINE1 elements in zygotic *Prmt5* mutant embryos at the eight-cell stage and blastocysts (Figures S6C–S6E).

We considered that the maternally inherited PRMT5 could to some extent compensate for the zygotic loss of PRMT5 during preimplantation development (Figure S6F). We therefore depleted the oocytes of the maternally inherited PRMT5, by generating an oocyte-specific *Prmt5* mutant female of *Prmt5<sup>fllox/-</sup>* with *Zp3-Cre* (*Zp3*, zona pellucida glycoprotein 3) that is active in maturing oocytes (Figure 6B) (de Vries et al., 2000). The loss of maternally inherited PRMT5 in oocytes did not have an effect on their properties or development, since we found these females to be fertile when mated with the wild-type males (Figures S1G and S6G).

Next we examined the development of preimplantation embryos that are depleted of both maternally inherited as well as zygotic PRMT5 by mating *Zp3Cre;Prmt5<sup>fllox/-</sup>* mice with *Prmt5<sup>mat-/-</sup>* males (Figure 6B). These embryos were collected at E2.5 and cultured for 2 days in vitro. Mutant embryos (*Prmt5<sup>mat-/-</sup>*) showed slightly higher *L1Orf1p* expression, which was not significant compared to controls (*Prmt5<sup>mat-/+</sup>*) (Figure 6C, 1:1.2,  $p = 0.19$ ). However, IAP-GAG expression in the ICM of blastocysts was significantly elevated in *Prmt5* mutant embryos (*Prmt5<sup>mat-/-</sup>*) (1:2.1,  $p < 0.01$ ) (Figure 6D). At E4.5 in vivo, mutant embryos (*Prmt5<sup>mat-/-</sup>*) have a reduced number of cells compared to control (*Prmt5<sup>mat-/+</sup>*), and they do not form of a blastocoel and appear to collapse, which likely causes early embryonic lethality (Figure S6H). This suggests that PRMT5 also plays an important role in the suppression of specific TEs in preimplantation embryos during DNA demethylation.

### Role of PRMT5 in Embryonic Stem Cells in “2i” Culture Conditions

We among others showed that ESCs when cultured in a chemically defined condition using inhibitors of GSK3 and MEK (2i) (Ying et al., 2008) have a hypomethylated status compared to ESCs in serum (Leitch et al., 2013). We tested whether PRMT5 has a similar role in suppressing TEs in ESCs cultured in 2i medium. PRMT5 in ESCs cultured in standard medium with serum is almost exclusively in the cytoplasm (Tee et al., 2010), but we found that the transfer of ES to 2i medium resulted in the detection of PRMT5 in the nucleus, consistent with DNA hy-

pomethylation (Leitch et al., 2013), albeit only in ~20%–30% of the ESCs. It is possible that nuclear-cytoplasmic translocation occurs dynamically in all individual cells (Figure S7A).

To examine the consequences of loss of PRMT5 in ESCs in “2i,” we crossed the *Prmt5<sup>fllox/fllox</sup>* mice to *R26Cre-ER<sup>T</sup>* (*R26Cre*) mice and derived ESCs in 2i condition (Figure S7B; Vooijs et al., 2001). Following treatment of cells with 4-hydroxytamoxifen (OHT), the floxed *Prmt5* allele was efficiently excised by *R26Cre* after 24 hr, followed by a decline in the *Prmt5* mRNA levels (~0.18-fold) (Figures S7B and S7E). These *R26Cre;Prmt5<sup>fllox/fllox</sup>* cells died 5 days after OHT treatment, while control EtOH treatment of *R26Cre;Prmt5<sup>fllox/+</sup>* or OHT-treated heterozygous line (*R26Cre;Prmt5<sup>fllox/+</sup>*) did not show any detectable defects (Figure S7C). While we detected upregulation of *IAP-Gag* (~1.8-fold) and not of *L1Orf1p* (~1.3-fold) in the mutant cells (Figure S7E), there was also no detectable increase in IAP-GAG protein (mean intensity, 1:1.02, Figure S7F). Indeed, we also neither detected any significant decrease in the global H2A/H4R3me2s modification, nor specifically on the TEs (Figures S7G and S7H). It is possible that *Prmt7*, a related family member, might compensate for the loss of *Prmt5*. Since we detected splicing defects in mutant ESCs, this might account for the death of these ESCs (Figure S7D; Bezzi et al., 2013).

### Loss of Cytoplasmic PRMT5 in Early Postimplantation Epiblast Cells

Development of the postimplantation epiblast is accompanied by DNA methylation, when PRMT5 translocates to the cytoplasm. To check whether the predominantly cytoplasmic PRMT5 in epiblast has any role in the repression of TEs, we examined these cells that were depleted of PRMT5 specifically at E5.5–E6.5 by mating *Prmt5<sup>fllox/fllox</sup>* mice with *Sox2-Cre* transgenic mice (Hayashi et al., 2002) (Figure S7I). Examination of these cells that were depleted of PRMT5 at E6.5 showed no significant expression of IAP-GAG by immunostaining (Figure S7J). Furthermore, qRT-PCR analysis of dissected epiblasts at E7.5 confirmed that both IAP and LINE1 showed no significant change in their expression in the *Prmt5* mutant epiblast (Figure S7K). However, as with the mutant ESCs, we detected splicing defects in the mutant epiblast cells (Figure S4E), which is consistent with a previous report (Bezzi et al., 2013).

Loss of PRMT5 did not, however, affect specification of PGCs, since we detected PGCs in E7.75 mutant embryos as judged by the detection of PGC markers, AP2 $\gamma$  and TNAP (Figures S7L and S7M). These results suggest that DNA methylation rather than

(B) Single-cell qPCR analysis of TEs as indicated from E11.5 control (gray) and mutant (black) FACS-sorted PGCs (GOF/SSEA1). Each bar represents a single cell. The data are combined as mean values  $\pm$  SE of all single cells as shown in the chart on the right. Significance is shown by Student's *t* test, \* $p < 0.05$ .  
(C) IF staining of *L1Orf1p* (red) in E10.5–E12.5 genital ridges and quantification of PGCs that shows an increase of *L1Orf1p* fluorescence intensity. PGCs were detected with GFP antibody for GOF (green). Scale bar, 10  $\mu$ m.  
(D) IF staining of IAP-GAG (red) in E11.5 and E12.5 genital ridges and quantification of PGCs that show an increase in IAP-GAG fluorescence intensity. Scale bar, 10  $\mu$ m. The arrowheads in (C) and (D) indicate examples of PGCs.  
(E) DNA methylation changes in IAPs determined by bisulfite sequencing with FACS-sorted PGCs (GOF/SSEA1) from E11.5 genital ridges from five control (#1–#5) and mutant embryos (#6–#10). DNA methylation of E11.5 PGCs from one littermate control and mutant embryo were tested for the LINE1, *Dazl* and *Sfi1* locus (#11–#16). The right graph shows the average level of methylation  $\pm$  SD at the IAP, LINE1, *Dazl*, and *Sfi1* loci.  
(F) ChIP with wild-type PGCs from E10.5, E11.5, and E13.5 male using a H2A/H4R3me2s antibody and IgG, respectively. ChIP-qPCR results  $\pm$  SE are shown. The *Oct4* and *Nanog* locus served as negative controls. Data are from biological duplicates. The genotype of the control is *Blimp1Cre;Prmt5<sup>fllox/+</sup>*, and the mutant is *Blimp1Cre;Prmt5<sup>fllox/-</sup>* in (A)–(E).  
See also Figure S5 and Table S3.

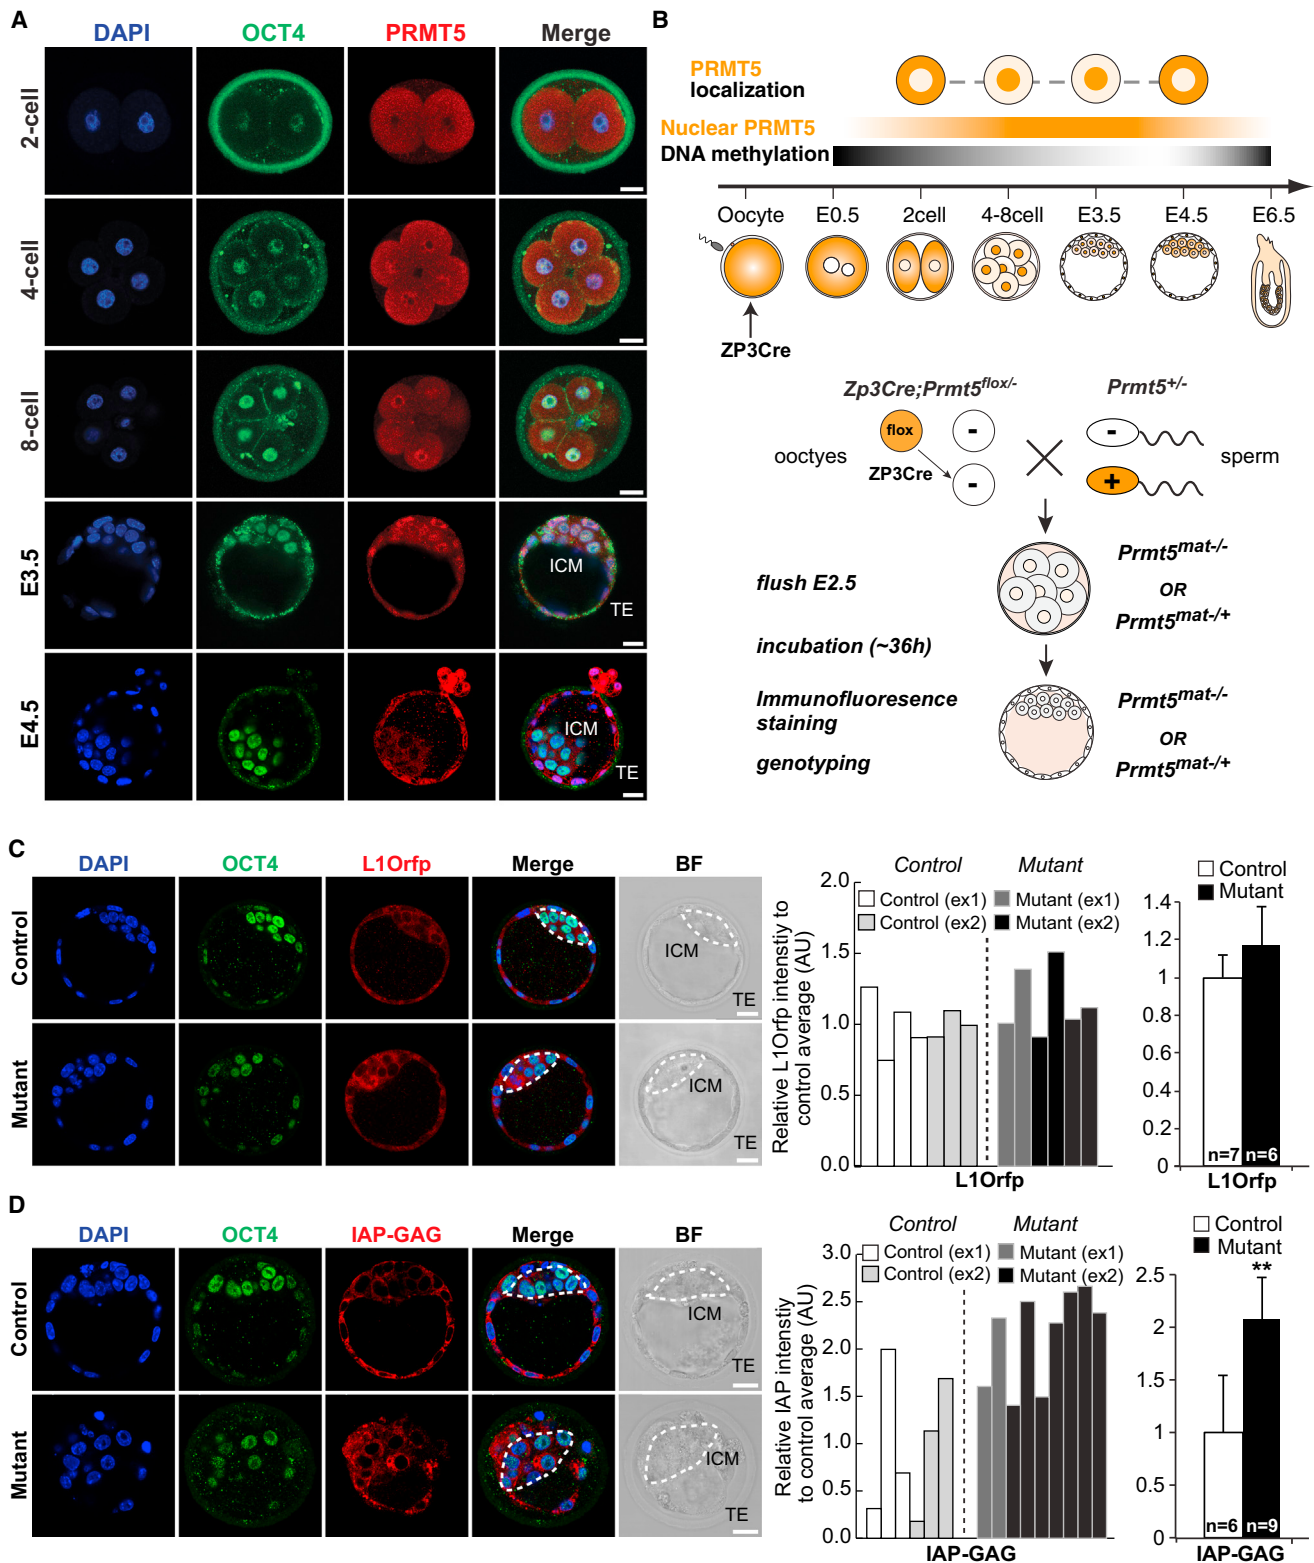

**Figure 6. *Prmt5* Is Required for the Suppression of TEs in Preimplantation Embryos**

(A) IF staining of OCT4 (green) and PRMT5 (red) in wild-type two-cell to blastocyst-stage preimplantation embryos (stages are indicated). Note that PRMT5 is detected in the nucleus from four-cell-stage embryos. TE, trophoblast; ICM, inner cell mass; scale bars, 20  $\mu$ m.

(legend continued on next page)

PRMT5 in the postimplantation epiblast cells is likely to repress TEs. Thus, loss of cytoplasmic PRMT5 has no marked effect on the expression of TEs.

## DISCUSSION

This study demonstrates that PRMT5 is indispensable during extensive resetting of the epigenome in early PGCs, and in preimplantation development. In both instances, PRMT5 relocates from the cytoplasm to the nucleus concomitantly with the onset of comprehensive DNA demethylation. Notably, there is also comprehensive erasure of H3K9me2 following specification of PGCs (Hajkova et al., 2008), which has been shown to suppress LINE1 during spermatogenesis (Di Giacomo et al., 2013). These epigenetic changes in the DNA and chromatin in early PGCs are conducive for the expression of TEs prior to the piRNA biosynthesis; nuclear PRMT5 seems to have a role in the suppression of TEs at this time.

PRMT5 catalyzes the repressive chromatin modification H2A/H4R3me2s, which is detected on the LINE1 and IAP in PGCs. Loss of PRMT5 results in the loss of H2A/H4R3me2s and upregulation of IAP and LINE1, suggesting that nuclear PRMT5 has a role in the repression of TEs. Similarly, loss of maternally inherited and zygotic PRMT5 results in upregulation of TEs. In contrast, loss of cytoplasmic PRMT5 in the postimplantation epiblast did not cause a significant upregulation of TEs, where DNA methylation is likely involved in their repression (Walsh et al., 1998). The nuclear PRMT5-dependent mechanism of TEs repression in the germline differs from the previously described repression of TEs by small RNA-induced silencing, by DNA methylation, or constitutive repressive histone modifications (Kuramochi-Miyagawa et al., 2008; Rowe et al., 2010). Notwithstanding, germline-specific loss of nuclear PRMT5 results in complete sterility of adult males and females. In mammals, TEs are more active in the germline compared to somatic lineages, and the loss of their suppression could affect fertility, as shown in mutants of piRNA components and *Tex19.1* (Carmell et al., 2007; Öllinger et al., 2008). This is especially likely at the time of global DNA demethylation and loss of H3K9me2 that could make PGCs more susceptible to misregulation of TEs. Their deregulation could result in deleterious effects, including high rate of illegitimate pairing between nonhomologous chromosomes during meiosis, which triggers an apoptotic checkpoint (Zamudio and Bourc'his, 2010), especially in female PGCs that enter meiosis at E13.5.

The onset of global DNA demethylation is a significant feature of PGCs and preimplantation embryos, but what precisely triggers the relocation of PRMT5 from the cytoplasm to the nucleus on both these occasions is unknown. PRMT5 has three nuclear export signals but no nuclear localization signal (Gu et al., 2012), suggesting that specific mediators might be involved in the nuclear import, acting together with a block on the export signal. These mediators could include BLIMP1 (a key regulator of PGC specification) since PRMT5-BLIMP1 interaction was reported previously (Ancelin et al., 2006), as are AJUBA and SNAIL in the case of U2OS cells (Hou et al., 2008). The targeting of PRMT5 to specific loci such as TEs remains to be elucidated.

Global DNA demethylation in actively dividing PGCs is potentially conducive for TE expression and transpositions, which would increase the vulnerability of PGCs to transpositions (Burns and Boeke, 2012). However, there is no evidence to suggest that DNA demethylation and H2A/H4R3me2s modification are functionally interdependent in PGCs. For example, H2A/H4R3me2s modification was still detectable on "imprinted" regions after the erasure of DNA methylation in PGCs (Henckel et al., 2012). Furthermore, while loss of PRMT5 and the H2A/H4R3me2s modification did not affect DNA methylation of LINE1, expression of LINE1 was elevated in *Prmt5* mutant PGCs. We propose that the H2A/H4R3me2s mark accompanies and compensates for the reduction in DNA methylation and the loss of H3K9me2 to repress TEs in PGCs. Moreover, the H2A/H4R3me2s modification can function regardless of DNA demethylation to repress gene expression (Henckel et al., 2012), potentially by inhibiting RNA polymerase II binding as they show inverse relationship on silenced loci in primary erythroid progenitors (Zhao et al., 2009).

The repressive H3K9me2 histone modification has been reported to suppress the LINE1 expression with piRNA pathway during spermatogenesis until late zygotene stages, which can compensate for defective DNA methylation and piRNA biogenesis in *Mili* mutant mice (Di Giacomo et al., 2013). Notably, the H3K9me2 modification is globally erased shortly after the specification of PGCs at E7.5 and is absent thereafter until E12.5 (Hajkova et al., 2008). Thus the nuclear PRMT5-mediated repressive H2A/H4R3me2s modification might be even more critical for the repression of TEs in early PGCs. The H3K27me3 histone modification was also reported to be enriched on retrotransposons at E13.5 PGCs (Ng et al., 2013). We did not detect any obvious difference in the H3K27me3 modification in *Prmt5* mutant PGCs at E11.5 compared to control. This suggests that this

(B) Schematic diagram of the subcellular localization of PRMT5 (shown in orange) and the level of nuclear PRMT5 during preimplantation development (top). Zp3Cre is expressed during oocyte maturation. The mating scheme shows how the maternal-zygotic *Prmt5* knockout embryos were generated followed by the experimental outline (bottom).

(C) IF staining of OCT4 (green) and L1Orf1p (red) in control (*Prmt5*<sup>mat-/-</sup>) and maternal-zygotic *Prmt5* mutant (*Prmt5*<sup>mat-/-</sup>) preimplantation embryos. The dashed line indicates the ICM region. Scale bars, 20  $\mu$ m. The fluorescence intensity of L1Orf1p in preimplantation embryos was determined using seven control and six mutant embryos. The data are from two independent experiments, and the relative L1Orf1p intensity of each embryo compared to the mean intensity of control embryos is shown. The right graph shows the mean intensity  $\pm$  SD of all embryos. n, number of embryos.

(D) IF staining of OCT4 (green) and IAP-GAG (red) in control (*Prmt5*<sup>mat-/-</sup>) and maternal-zygotic *Prmt5* mutant (*Prmt5*<sup>mat-/-</sup>) preimplantation embryos. The ICM region is indicated by the dashed line. Scale bars, 20  $\mu$ m. The fluorescence intensity of IAP-GAG in preimplantation embryos was determined in six control embryos and nine mutant embryos. The data are from two independent experiments, and the relative IAP-GAG intensity of each embryo compared to the mean intensity of control embryos is shown. The right graph shows the mean intensity  $\pm$  SD of all embryos. n, number of embryos; significance was tested with the Student's t test, \*\*p < 0.01.

See also Figure S6.

modification might function independently for the suppression of TEs, but it evidently does not compensate for the loss of H2A/H4R3me2s at E11.5 in mutant PGCs.

There is a transient (but not sustained) developmentally programmed expression of TEs in the ~2- to 4-cell-stage embryos, which is important for the “oocyte to embryo” transition. Some TEs act as alternative promoters and exons for the expression of key host genes with significant roles in development (Peaston et al., 2004; Fadloun et al., 2013). The transient expression of LINE-1 and IAP at this time is unlike the aberrant expression of LINE1 and IAP in *Prmt5* mutant PGCs with potentially detrimental consequences for the germline, and thereafter for embryonic development. While there is relatively low H2A/H4R3me2s modification at the two-cell stage, following relocation of PRMT5 from the cytoplasm at ~4-cell stage, this modification becomes detectable from the 8- to 16-cell stage, which coincides with the ongoing DNA demethylation (Smith et al., 2012). The maternal/zygotic PRMT5 plays an important role when the DNA methylation reaches its lowest levels at the blastocyst stage, at which point there is an upregulation of IAPs in the mutant. However, there is no significant effect on LINE-1 expression, which might be regulated by an alternative mechanism (Fadloun et al., 2013).

It is known that KAP1 and ESET can suppress TEs through the H3K9me3 and H4K20me3 modifications (Matsui et al., 2010; Rowe et al., 2010). While detailed analysis of these modifications at TEs of mutant PGCs is not possible, there were no detectable changes on the global level in H3K9me3 or H4K20me3, suggesting that the loss of H2A/H4R3me2s at TEs is not compensated by other histone modifications. On the other hand, loss of the H2A/H4R3me2s repressive modification in *Prmt5* mutant PGCs resulted in only a few significant overall transcriptional changes. This could be because the other repressive histone modifications might compensate for the loss of H2A/H4R3me2s (Matsui et al., 2010; Rowe et al., 2010). Therefore, the key role of the PRMT5 catalyzed nuclear H2A/H4R3me2s modification in PGCs is evidently in the repression of TEs in PGCs.

The misregulation of p53 signaling genes and the apoptosis in *Prmt5* mutant PGCs is potentially a combinatorial consequence of splicing defects and TE-induced DNA damage response (Belgnaoui et al., 2006; Gasior et al., 2006). The splicing defects have been observed in other instances, such as neural progenitor cells (Bezzi et al., 2013), as we also did in the *Prmt5* mutant ESCs and in postimplantation epiblast cells, which are ascribed to the cytoplasmic PRMT5. In contrast, upregulation of TEs is a PGC- and preimplantation embryo-specific defect in *Prmt5* mutant. The expression of TEs following the loss of nuclear PRMT5, however, is in addition to the effects of the loss of cytoplasmic PRMT5 in ESCs, postimplantation epiblast cells, and neuronal progenitors (Bezzi et al., 2013). Notably, the p53 signaling-related genes including *Cdkn1a* (also known as p21) are among the top differentially expressed genes in *Prmt5* mutant PGCs; consistently, in *Dnmt1* null fibroblasts, IAP upregulation following global DNA demethylation also results in the activation of *Cdkn1a* and causes p53-dependent apoptosis (Jackson-Grusby et al., 2001). Thus, activation of TEs could contribute to the activation of the p53-signaling pathway. Due to subfertility of p53 mutant female mice and the small litter

size of *Blimp1Cre;Prmt5<sup>fllox</sup>* mice (~4 embryos/litter, Figure S1G), it is not possible to investigate the mutant *Prmt5* PGCs in the p53 null background (Hu et al., 2007).

It is known that there is a dramatic increase in DNA methylation after implantation of the blastocysts, as observed in the postimplantation epiblast cells (Borgel et al., 2010). Thus, it is possible that DNA methylation suppresses TEs in epiblast cells, and subsequently in most somatic tissues. Consistent with this hypothesis, PRMT5 is predominantly in the cytoplasm of the postimplantation epiblast cells, where it is likely to have other roles such as in the regulation of alternative splicing. Indeed, deletion of cytoplasmic PRMT5 in postimplantation epiblast cells does not significantly affect the expression of TEs, suggesting that DNA methylation is sufficient to suppress TEs in these cells. On the other hand, the lack of upregulation of IAP-GAG in *Prmt5* mutant hypomethylated ESCs in 2i is consistent with the presence of the H2A/H4R3me2s modification, which could be attributed to *Prmt7*. It is likely that, as in the postimplantation epiblast, cytoplasmic PRMT5 in ESCs may have a role in alternative splicing.

In PGCs, PRMT5 relocates to the cytoplasm at ~E11.5, resulting in a loss of enrichment of H2A/H4R3me2s at TEs in male PGCs at ~E13.5, which indicates a link between the enzyme and the repressive mark (Figures 5F and S2A). There is initiation of piRNAs biosynthesis after global DNA demethylation from E8.5–E11.5 PGCs, and the expression of *Mili*, which is relatively low in E10.5 PGCs, increases from E12.5 onward (Figure S7N). PIWI proteins, MILI and MIWI2, become detectable at E12.5 and E15.5, respectively (Aravin et al., 2008; Kuramochi-Miyagawa et al., 2004). Interestingly, expression of *Mili* and *Miwi2* themselves may be directly linked to DNA demethylation, which thus couples both nuclear PRMT5 and piRNA biogenesis to epigenetic reprogramming in PGCs (Hackett et al., 2012). Importantly, while a loss of MILI and MIWI2 results in postnatal germ cell defects (Carmell et al., 2007), there is comprehensive and dramatic loss of early PGCs following loss of PRMT5.

The translocation of PRMT5 to the cytoplasm after ~E11.5 plays yet another distinct role as it methylates murine PIWI family proteins, which is essential for piRNA biogenesis and the silencing of TEs (Vagin et al., 2009). Notably, the suppression of TEs by PRMT5 through PIWI protein has also been shown in planarians and *Drosophila* and is therefore evolutionarily conserved (Kirino et al., 2010; Rouhana et al., 2012). In mice, the mechanism of piRNA-based repression of TEs involves DNA methylation (Aravin et al., 2008). By contrast, nuclear PRMT5 is required in E8.5–E11.5 for the repression of TEs through the H2A/H4R3me2s repressive chromatin modification; a mutation in *Prmt5* results in loss of early PGCs in both male and female embryos before the onset of meiosis (Figure 7). The role of DNA methylation in the suppression of TEs in early PGCs is also unlikely, since both the de novo and maintenance DNA methylation enzymes are repressed in E8.5–E11.5 PGCs (Hackett et al., 2013; Figure S5D). Furthermore, the repression of TEs by PRMT5-mediated H2A/H4R3me2s was seen without a significant effect on DNA methylation. In conclusion, our study reveals a role for nuclear PRMT5 in protecting the genome by silencing TEs at a critical time during comprehensive epigenetic reprogramming and global DNA demethylation in early PGCs and preimplantation embryos in mice.

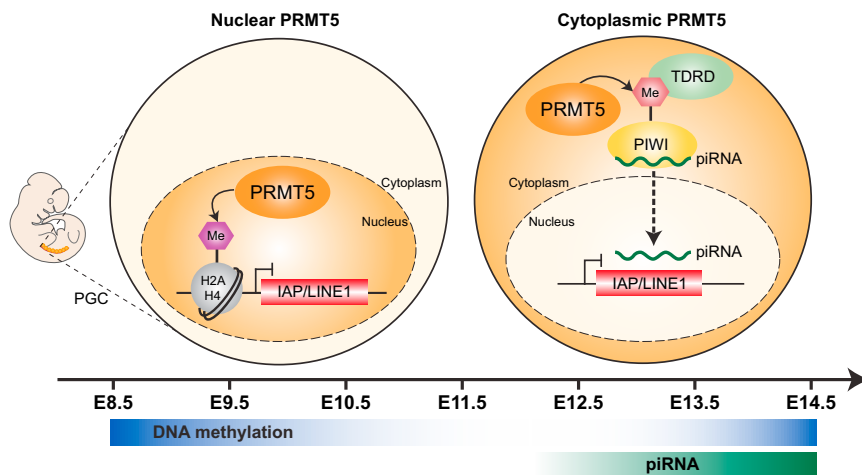

**Figure 7. Model of the Suppression of IAP and LINE1 by PRMT5 in PGCs**

PRMT5 has a dual function during epigenetic reprogramming of PGCs: when global DNA demethylation starts (E8.5–E10.5), PRMT5 translocates to the nucleus, and the nuclear PRMT5 catalyzes the H2A/H4R3me2s modification to suppress IAP and LINE1 (left). After global DNA demethylation at E12.5, expression of *Mili* starts to become detectable. PRMT5 translocates to the cytoplasm at ~E11.5 to coincide with the onset of the expression of PIWI proteins. Cytoplasmic PRMT5 is required to methylate PIWI proteins. This methylated arginine residue recruits Tudor domain proteins to facilitate piRNA biogenesis, which in turn are required for the silencing of IAP and LINE1 (right).

See also Figure S7.

## EXPERIMENTAL PROCEDURES

Detailed experimental procedures are provided in the [Supplemental Information](#).

### Targeted Disruption of *Prmt5* Locus and Generation of Cell-Type-Specific *Prmt5* Knockout Mice

The *Prmt5* targeting vector was constructed by inserting *Pgk-neo* flanked by *frt* site and the 5' *loxP* site the sixth intron of *Prmt5*. 3' *loxP* site to PGK-neo cassette was inserted into the seventh intron of *Prmt5* (Figure S1). The targeting vector was linearized, electroporated into E14Tg2a ESCs (129/Ola). Detailed procedure of screening and generation of mice is provided in the [Supplemental Information](#). All husbandry and experiments involving mice were carried out according to the local ethics committee and were performed in a facility designated by the Home Office.

### Whole-Mount Immunofluorescence Staining

Embryos from timed mating were dissected and processed for immunostaining as described previously (Ohinata et al., 2005). Images were acquired using confocal microscope (Olympus, Leica) and analyzed with ImageJ software.

## ACCESSION NUMBERS

All RNA-seq data files are available for download from NCBI Gene Expression Omnibus (<http://www.ncbi.nlm.nih.gov/geo/>) under accession number GSE60875.

## SUPPLEMENTAL INFORMATION

Supplemental Information includes seven figures, three tables, two movies, and Supplemental Experimental Procedures and be found with this article at <http://dx.doi.org/10.1016/j.molcel.2014.10.003>.

## AUTHOR CONTRIBUTIONS

S.K. designed the project, performed experiments, analyzed the data, and wrote the manuscript. U.G. performed experiments, analyzed data, and contributed to the manuscript. J.J.Z., J.A.H., D.C., S.B., C.L., and R.S. performed experiments and analyzed data. S.D. and G.E.A. analyzed RNA-seq data. M.A.S. designed the project and wrote the manuscript.

## ACKNOWLEDGMENTS

We thank Wee-Wei Tee for help on initial project design, Nigel Miller for flow cytometry, Julien Bauer and Charles Bradshaw for bioinformatics analysis,

Dang Vinh Do and Anne Turberfield for sharing preliminary data, Alex Bortvin and Bryan R. Cullen for generously sharing antibodies, Kaiqin Lao and Applied Biosystems for RNA-Seq run, and members of the Surani lab for helpful discussions. U.G. was supported by a Marie Skłodowska Curie Intra-European Fellowship. J.J.Z. was a recipient of a Wellcome Trust PhD Studentship (RG44593). This research was supported by grants from the Wellcome Trust to M.A.S. (WT096738).

Received: May 30, 2014

Revised: September 3, 2014

Accepted: October 2, 2014

Published: November 6, 2014

## REFERENCES

- Ancelin, K., Lange, U.C., Hajkova, P., Schneider, R., Bannister, A.J., Kouzarides, T., and Surani, M.A. (2006). Blimp1 associates with Prmt5 and directs histone arginine methylation in mouse germ cells. *Nat. Cell Biol.* 8, 623–630.
- Aravin, A.A., Sachidanandam, R., Bourc'his, D., Schaefer, C., Pezic, D., Toth, K.F., Bestor, T., and Hannon, G.J. (2008). A piRNA pathway primed by individual transposons is linked to de novo DNA methylation in mice. *Mol. Cell* 31, 785–799.
- Belgnaoui, S.M., Gosden, R.G., Semmes, O.J., and Haoudi, A. (2006). Human LINE-1 retrotransposon induces DNA damage and apoptosis in cancer cells. *Cancer Cell Int.* 6, 13.
- Bezzi, M., Teo, S.X., Muller, J., Mok, W.C., Sahu, S.K., Vardy, L.A., Bonday, Z.Q., and Guccione, E. (2013). Regulation of constitutive and alternative splicing by PRMT5 reveals a role for Mdm4 pre-mRNA in sensing defects in the spliceosomal machinery. *Genes Dev.* 27, 1903–1916.
- Borgel, J., Guibert, S., Li, Y., Chiba, H., Schübeler, D., Sasaki, H., Forné, T., and Weber, M. (2010). Targets and dynamics of promoter DNA methylation during early mouse development. *Nat. Genet.* 42, 1093–1100.
- Branscombe, T.L., Frankel, A., Lee, J.H., Cook, J.R., Yang, Z., Pestka, S., and Clarke, S. (2001). PRMT5 (Janus kinase-binding protein 1) catalyzes the formation of symmetric dimethylarginine residues in proteins. *J. Biol. Chem.* 276, 32971–32976.
- Burns, K.H., and Boeke, J.D. (2012). Human transposon tectonics. *Cell* 149, 740–752.
- Carmell, M.A., Girard, A., van de Kant, H.J.G., Bourc'his, D., Bestor, T.H., de Rooij, D.G., and Hannon, G.J. (2007). MIWI2 is essential for spermatogenesis and repression of transposons in the mouse male germline. *Dev. Cell* 12, 503–514.

- Chapman, V., Forrester, L., Sanford, J., Hastie, N., and Rossant, J. (1984). Cell lineage-specific undermethylation of mouse repetitive DNA. *Nature* 307, 284–286.
- de Vries, W.N., Binns, L.T., Fancher, K.S., Dean, J., Moore, R., Kemler, R., and Knowles, B.B. (2000). Expression of Cre recombinase in mouse oocytes: a means to study maternal effect genes. *Genesis* 26, 110–112.
- Di Giacomo, M., Comazzetto, S., Saini, H., De Fazio, S., Carrieri, C., Morgan, M., Vasiliauskaite, L., Benes, V., Enright, A.J., and O'Carroll, D. (2013). Multiple epigenetic mechanisms and the piRNA pathway enforce LINE1 silencing during adult spermatogenesis. *Mol. Cell* 50, 601–608.
- Durcova-Hills, G., Tang, F., Doody, G., Tooze, R., and Surani, M.A. (2008). Reprogramming primordial germ cells into pluripotent stem cells. *PLoS ONE* 3, e3531.
- Fadloun, A., Le Gras, S., Jost, B., Ziegler-Birling, C., Takahashi, H., Gorab, E., Caminci, P., and Torres-Padilla, M.E. (2013). Chromatin signatures and retrotransposon profiling in mouse embryos reveal regulation of LINE-1 by RNA. *Nat. Struct. Mol. Biol.* 20, 332–338.
- Gasior, S.L., Wakeman, T.P., Xu, B., and Deininger, P.L. (2006). The human LINE-1 retrotransposon creates DNA double-strand breaks. *J. Mol. Biol.* 357, 1383–1393.
- Gerdas, J., Lemke, H., Baisch, H., Wacker, H.H., Schwab, U., and Stein, H. (1984). Cell cycle analysis of a cell proliferation-associated human nuclear antigen defined by the monoclonal antibody Ki-67. *J. Immunol.* 133, 1710–1715.
- Gu, Z., Li, Y., Lee, P., Liu, T., Wan, C., and Wang, Z. (2012). Protein arginine methyltransferase 5 functions in opposite ways in the cytoplasm and nucleus of prostate cancer cells. *PLoS ONE* 7, e44033.
- Hackett, J.A., Reddington, J.P., Nestor, C.E., Dunican, D.S., Branco, M.R., Reichmann, J., Reik, W., Surani, M.A., Adams, I.R., and Meehan, R.R. (2012). Promoter DNA methylation couples genome-defence mechanisms to epigenetic reprogramming in the mouse germline. *Development* 139, 3623–3632.
- Hackett, J.A., Sengupta, R., Zyllicz, J.J., Murakami, K., Lee, C., Down, T.A., and Surani, M.A. (2013). Germline DNA demethylation dynamics and imprint erasure through 5-hydroxymethylcytosine. *Science* 339, 448–452.
- Hajkova, P., Erhardt, S., Lane, N., Haaf, T., El-Maarri, O., Reik, W., Walter, J., and Surani, M.A. (2002). Epigenetic reprogramming in mouse primordial germ cells. *Mech. Dev.* 117, 15–23.
- Hajkova, P., Ancelin, K., Waldmann, T., Lacoste, N., Lange, U.C., Cesari, F., Lee, C., Almouzni, G., Schneider, R., and Surani, M.A. (2008). Chromatin dynamics during epigenetic reprogramming in the mouse germ line. *Nature* 452, 877–881.
- Hayashi, S., Lewis, P., Pevny, L., and McMahon, A.P. (2002). Efficient gene modulation in mouse epiblast using a Sox2Cre transgenic mouse strain. *Mech. Dev.* 119 (Suppl 1), S97–S101.
- Henckel, A., Chebli, K., Kota, S.K., Arnaud, P., and Feil, R. (2012). Transcription and histone methylation changes correlate with imprint acquisition in male germ cells. *EMBO J.* 31, 606–615.
- Hou, Z., Peng, H., Ayyanathan, K., Yan, K.P., Langer, E.M., Longmore, G.D., and Rauscher, F.J., 3rd. (2008). The LIM protein AJUBA recruits protein arginine methyltransferase 5 to mediate SNAIL-dependent transcriptional repression. *Mol. Cell Biol.* 28, 3198–3207.
- Hu, W., Feng, Z., Teresky, A.K., and Levine, A.J. (2007). p53 regulates maternal reproduction through LIF. *Nature* 450, 721–724.
- Jackson-Grusby, L., Beard, C., Possemato, R., Tudor, M., Fambrough, D., Csankovszki, G., Dausman, J., Lee, P., Wilson, C., Lander, E., and Jaenisch, R. (2001). Loss of genomic methylation causes p53-dependent apoptosis and epigenetic deregulation. *Nat. Genet.* 27, 31–39.
- Jansson, M., Durant, S.T., Cho, E.C., Sheahan, S., Edelman, M., Kessler, B., and La Thangue, N.B. (2008). Arginine methylation regulates the p53 response. *Nat. Cell Biol.* 10, 1431–1439.
- Kirino, Y., Vourekas, A., Sayed, N., de Lima Alves, F., Thomson, T., Lasko, P., Rappilber, J., Jongens, T.A., and Mourelatos, Z. (2010). Arginine methylation of Aubergine mediates Tudor binding and germ plasm localization. *RNA* 16, 70–78.
- Kuramochi-Miyagawa, S., Kimura, T., Ijiri, T.W., Isobe, T., Asada, N., Fujita, Y., Ikawa, M., Iwai, N., Okabe, M., Deng, W., et al. (2004). Mili, a mammalian member of piwi family gene, is essential for spermatogenesis. *Development* 131, 839–849.
- Kuramochi-Miyagawa, S., Watanabe, T., Gotoh, K., Totoki, Y., Toyoda, A., Ikawa, M., Asada, N., Kojima, K., Yamaguchi, Y., Ijiri, T.W., et al. (2008). DNA methylation of retrotransposon genes is regulated by Piwi family members MILI and MIWI2 in murine fetal testes. *Genes Dev.* 22, 908–917.
- Leitch, H.G., McEwen, K.R., Turp, A., Encheva, V., Carroll, T., Grabole, N., Mansfield, W., Nashun, B., Knezovich, J.G., Smith, A., et al. (2013). Naive pluripotency is associated with global DNA hypomethylation. *Nat. Struct. Mol. Biol.* 20, 311–316.
- Magnúsdóttir, E., Dietmann, S., Murakami, K., Günesdogan, U., Tang, F., Bao, S., Diamanti, E., Lao, K., Gottgens, B., and Azim Surani, M. (2013). A tripartite transcription factor network regulates primordial germ cell specification in mice. *Nat. Cell Biol.* 15, 905–915.
- Matsui, T., Leung, D., Miyashita, H., Maksakova, I.A., Miyachi, H., Kimura, H., Tachibana, M., Lorincz, M.C., and Shinkai, Y. (2010). Proviral silencing in embryonic stem cells requires the histone methyltransferase ESET. *Nature* 464, 927–931.
- McGrath, J., and Solter, D. (1984). Completion of mouse embryogenesis requires both the maternal and paternal genomes. *Cell* 37, 179–183.
- Nakaki, F., Hayashi, K., Ohta, H., Kurimoto, K., Yabuta, Y., and Saitou, M. (2013). Induction of mouse germ-cell fate by transcription factors in vitro. *Nature* 501, 222–226.
- Ng, J.H., Kumar, V., Muratani, M., Kraus, P., Yeo, J.C., Yaw, L.P., Xue, K., Lufkin, T., Prabhakar, S., and Ng, H.H. (2013). In vivo epigenomic profiling of germ cells reveals germ cell molecular signatures. *Dev. Cell* 24, 324–333.
- Ohinata, Y., Payer, B., O'Carroll, D., Ancelin, K., Ono, Y., Sano, M., Barton, S.C., Obukhanych, T., Nussenzweig, M., Tarakhovsky, A., et al. (2005). Blimp1 is a critical determinant of the germ cell lineage in mice. *Nature* 436, 207–213.
- Öllinger, R., Childs, A.J., Burgess, H.M., Speed, R.M., Lundegaard, P.R., Reynolds, N., Gray, N.K., Cooke, H.J., and Adams, I.R. (2008). Deletion of the pluripotency-associated Tex19.1 gene causes activation of endogenous retroviruses and defective spermatogenesis in mice. *PLoS Genet.* 4, e1000199.
- Pal, S., Vishwanath, S.N., Erdjument-Bromage, H., Tempst, P., and Sif, S. (2004). Human SWI/SNF-associated PRMT5 methylates histone H3 arginine 8 and negatively regulates expression of ST7 and NM23 tumor suppressor genes. *Mol. Cell Biol.* 24, 9630–9645.
- Peaston, A.E., Evsikov, A.V., Graber, J.H., de Vries, W.N., Holbrook, A.E., Solter, D., and Knowles, B.B. (2004). Retrotransposons regulate host genes in mouse oocytes and preimplantation embryos. *Dev. Cell* 7, 597–606.
- Qin, C., Wang, Z., Shang, J., Bekkari, K., Liu, R., Pacchione, S., McNulty, K.A., Ng, A., Barnum, J.E., and Storer, R.D. (2010). Intracisternal A particle genes: Distribution in the mouse genome, active subtypes, and potential roles as species-specific mediators of susceptibility to cancer. *Mol. Carcinog.* 49, 54–67.
- Rouhana, L., Vieira, A.P., Roberts-Galbraith, R.H., and Newmark, P.A. (2012). PRMT5 and the role of symmetrical dimethylarginine in chromatoid bodies of planarian stem cells. *Development* 139, 1083–1094.
- Rowe, H.M., Jakobsson, J., Mesnard, D., Rougemont, J., Reynard, S., Aktas, T., Maillard, P.V., Layard-Liesching, H., Verp, S., Marquis, J., et al. (2010). KAP1 controls endogenous retroviruses in embryonic stem cells. *Nature* 463, 237–240.
- Seisenberger, S., Andrews, S., Krueger, F., Arand, J., Walter, J., Santos, F., Popp, C., Thienpont, B., Dean, W., and Reik, W. (2012). The dynamics of genome-wide DNA methylation reprogramming in mouse primordial germ cells. *Mol. Cell* 48, 849–862.

- Smith, Z.D., Chan, M.M., Mikkelsen, T.S., Gu, H., Gnirke, A., Regev, A., and Meissner, A. (2012). A unique regulatory phase of DNA methylation in the early mammalian embryo. *Nature* 484, 339–344.
- Surani, M.A., Barton, S.C., and Norris, M.L. (1984). Development of reconstituted mouse eggs suggests imprinting of the genome during gametogenesis. *Nature* 308, 548–550.
- Surani, M.A., Hayashi, K., and Hajkova, P. (2007). Genetic and epigenetic regulators of pluripotency. *Cell* 128, 747–762.
- Tang, F., Barbacioru, C., Nordman, E., Li, B., Xu, N., Bashkirov, V.I., Lao, K., and Surani, M.A. (2010). RNA-Seq analysis to capture the transcriptome landscape of a single cell. *Nat. Protoc.* 5, 516–535.
- Tee, W.W., Pardo, M., Theunissen, T.W., Yu, L., Choudhary, J.S., Hajkova, P., and Surani, M.A. (2010). Prmt5 is essential for early mouse development and acts in the cytoplasm to maintain ES cell pluripotency. *Genes Dev.* 24, 2772–2777.
- Vagin, V.V., Wohlschlegel, J., Qu, J., Jonsson, Z., Huang, X., Chuma, S., Girard, A., Sachidanandam, R., Hannon, G.J., and Aravin, A.A. (2009). Proteomic analysis of murine Piwi proteins reveals a role for arginine methylation in specifying interaction with Tudor family members. *Genes Dev.* 23, 1749–1762.
- Vooijs, M., Jonkers, J., and Berns, A. (2001). A highly efficient ligand-regulated Cre recombinase mouse line shows that LoxP recombination is position dependent. *EMBO Rep.* 2, 292–297.
- Wallace, N.A., Belancio, V.P., and Deininger, P.L. (2008). L1 mobile element expression causes multiple types of toxicity. *Gene* 419, 75–81.
- Walsh, C.P., Chaillet, J.R., and Bestor, T.H. (1998). Transcription of IAP endogenous retroviruses is constrained by cytosine methylation. *Nat. Genet.* 20, 116–117.
- Xu, X., Hoang, S., Mayo, M.W., and Bekiranov, S. (2010). Application of machine learning methods to histone methylation ChIP-Seq data reveals H4R3me2 globally represses gene expression. *BMC Bioinformatics* 11, 396.
- Yeom, Y.I., Fuhrmann, G., Ovitt, C.E., Brehm, A., Ohbo, K., Gross, M., Hübner, K., and Schöler, H.R. (1996). Germline regulatory element of Oct-4 specific for the totipotent cycle of embryonal cells. *Development* 122, 881–894.
- Ying, Q.L., Wray, J., Nichols, J., Battle-Morera, L., Doble, B., Woodgett, J., Cohen, P., and Smith, A. (2008). The ground state of embryonic stem cell self-renewal. *Nature* 453, 519–523.
- Zamudio, N., and Bourc'his, D. (2010). Transposable elements in the mammalian germline: a comfortable niche or a deadly trap? *Heredity (Edinb)* 105, 92–104.
- Zhao, Q., Rank, G., Tan, Y.T., Li, H., Moritz, R.L., Simpson, R.J., Cerruti, L., Curtis, D.J., Patel, D.J., Allis, C.D., et al. (2009). PRMT5-mediated methylation of histone H4R3 recruits DNMT3A, coupling histone and DNA methylation in gene silencing. *Nat. Struct. Mol. Biol.* 16, 304–311.

Molecular Cell, Volume 56

## **Supplemental Information**

### **PRMT5 Protects Genomic Integrity during Global DNA Demethylation in Primordial Germ Cells and Preimplantation Embryos**

Shinseog Kim, Ufuk Günesdogan, Jan J. Zylicz, Jamie A. Hackett, Delphine Cougot, Siqin Bao, Caroline Lee, Sabine Dietmann, George E. Allen, Roopsha Sengupta, and M. Azim Surani

**Figure S1**

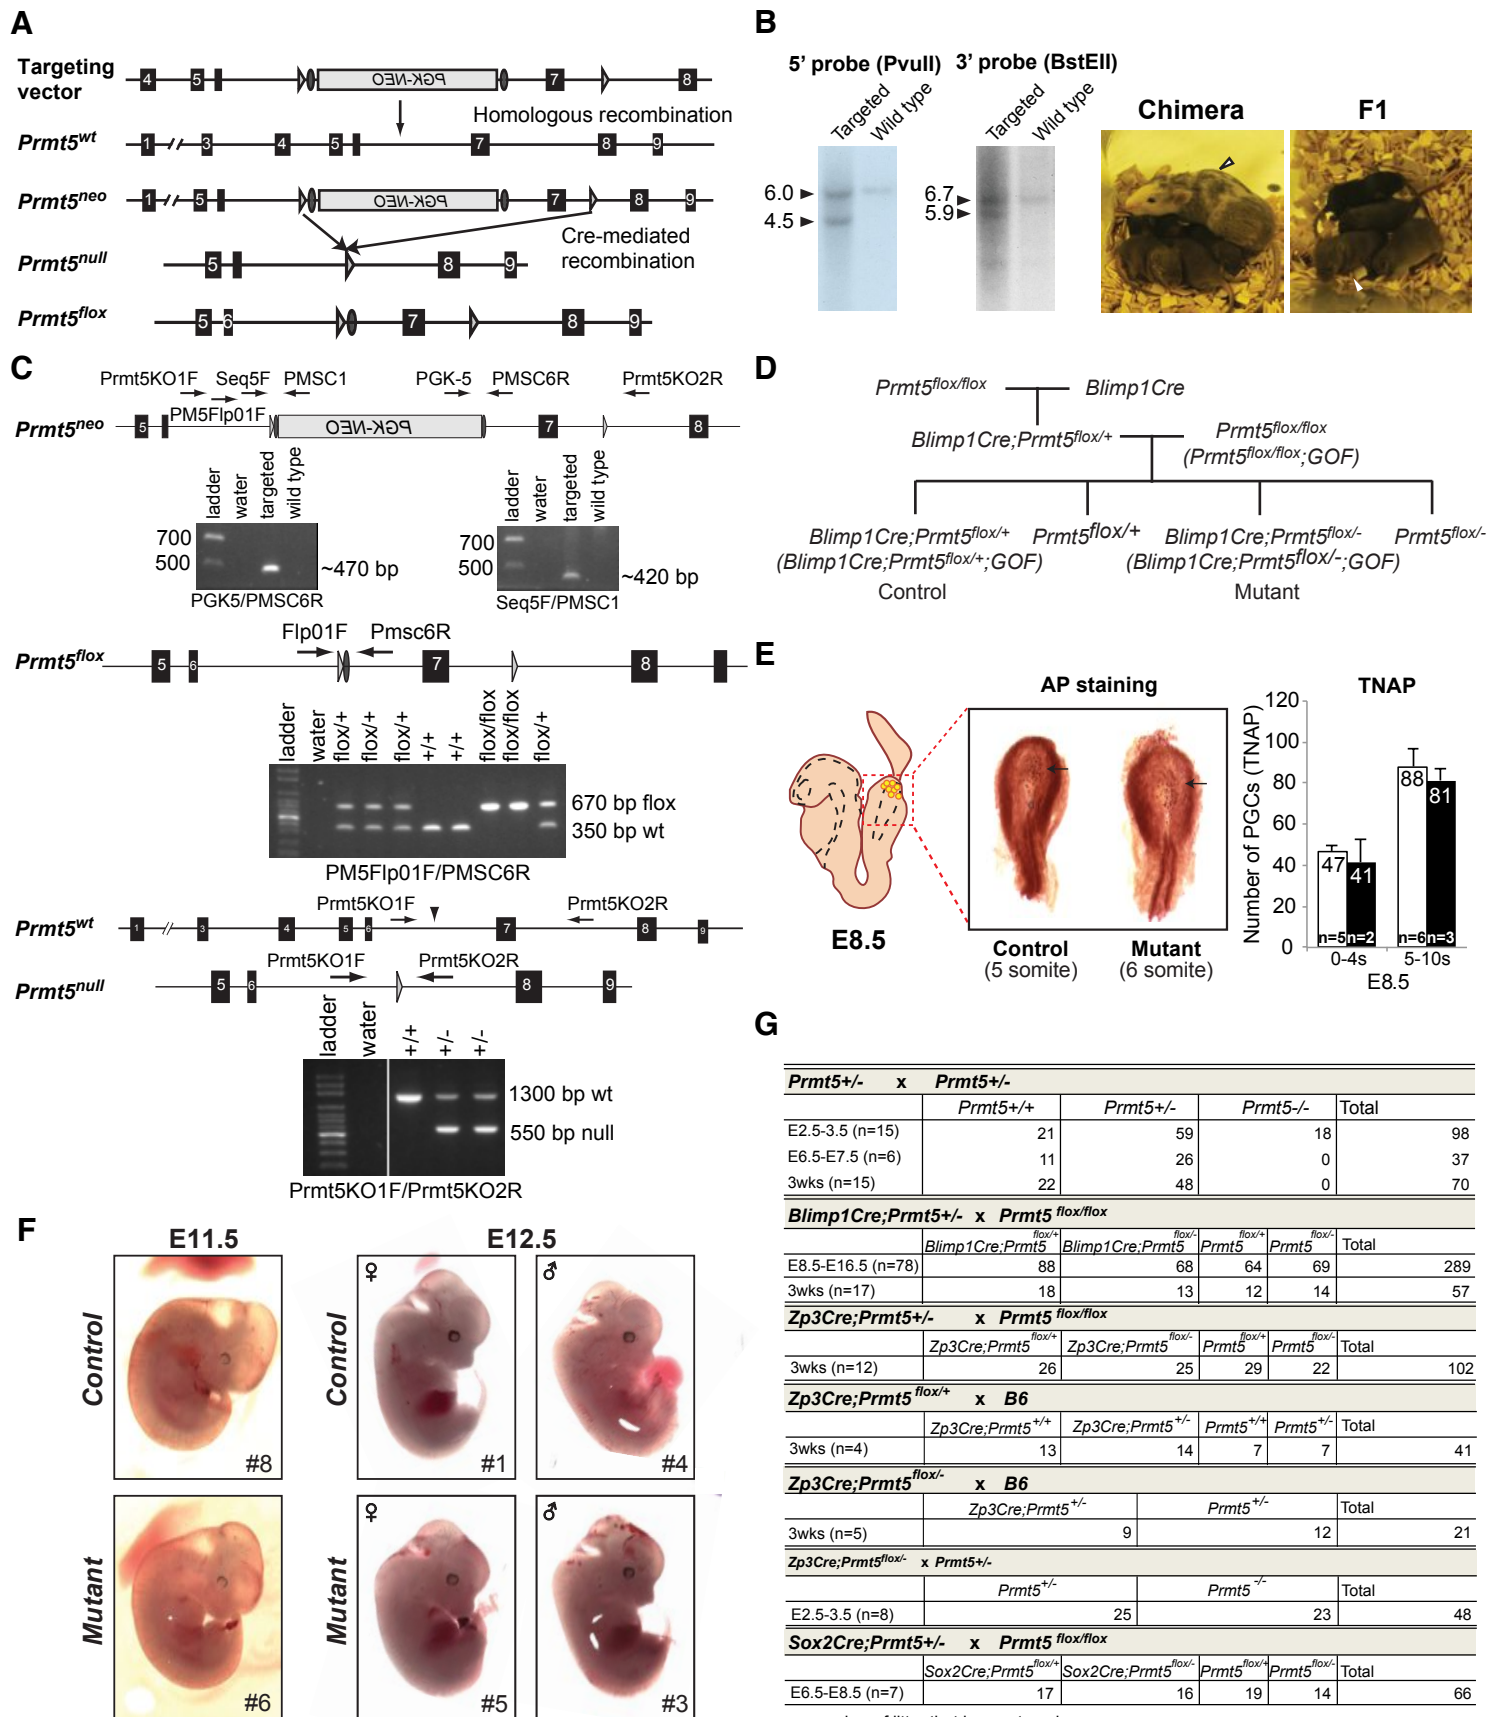

Figure S1 related to Figure 1.

- (A) A schematic diagram showing the targeting strategy for the generation of a conditional allele of *Prmt5*. FRT sites are shown as ovals and LoxP sites as triangles. Cre-mediated deletion removed exon7 and generated an early stop codon at exon8 to cut off the methyltransferase domain of *Prmt5*.
- (B) Left panel: Southern blotting of the targeted allele and an example of a positive ES clone. The 5' probe hybridized on the left arm of the allele (4.5 kb targeted, 6.0 kb wild type) and the 3' probe detected the right arm (5.9 kb targeted, 6.7 kb wild type). Right panel: correctly targeted ES clone (E14 cells; 129P1 background) was injected into C57BL6/J blastocysts and showed high contribution to chimeras (white and agouti coat color; arrowhead). F1 agouti mice (white arrowhead) show successful germline transmission of the targeted allele.
- (C) Schematic diagram of the targeted allele and location of primers for genotyping. An example for each genotyping PCR is shown.
- (D) Breeding scheme to delete *Prmt5* in PGCs. *Blimp1Cre;Prmt5<sup>fllox/+</sup>* (PGC: *Prmt5<sup>+/-</sup>*) embryos were used as a control when littermates were available and *Blimp1Cre;Prmt5<sup>fllox/-</sup>* (PGC: *Prmt5<sup>-/-</sup>*) were used as the mutant. The GOF transgene refers to *Oct4ΔPE-GFP*, which is expressed in PGCs.
- (E) Alkaline phosphatase (AP) staining with control (*Blimp1Cre;Prmt5<sup>fllox/+</sup>*) and mutant (*Blimp1Cre;Prmt5<sup>fllox/-</sup>*) embryos at E8.5. Shown is the basal allantoic region. Brown spot indicates AP positive PGCs (arrow). Right graph shows counted AP positive PGCs in control (white bar) and mutant embryos (black bar). n=number of embryos.
- (F) Representative image of embryos from E11.5 and E12.5. Left panel: control (*Blimp1Cre;Prmt5<sup>fllox/+</sup>*) and mutant (*Blimp1Cre;Prmt5<sup>fllox/-</sup>*) embryo at E11.5. Right panel: female (left) and male (right) embryos at E12.5. No apparent morphological differences are observed between control and mutant at both stages.
- (G) Genotyping results for embryos and/or litters from indicated matings.

Figure S2

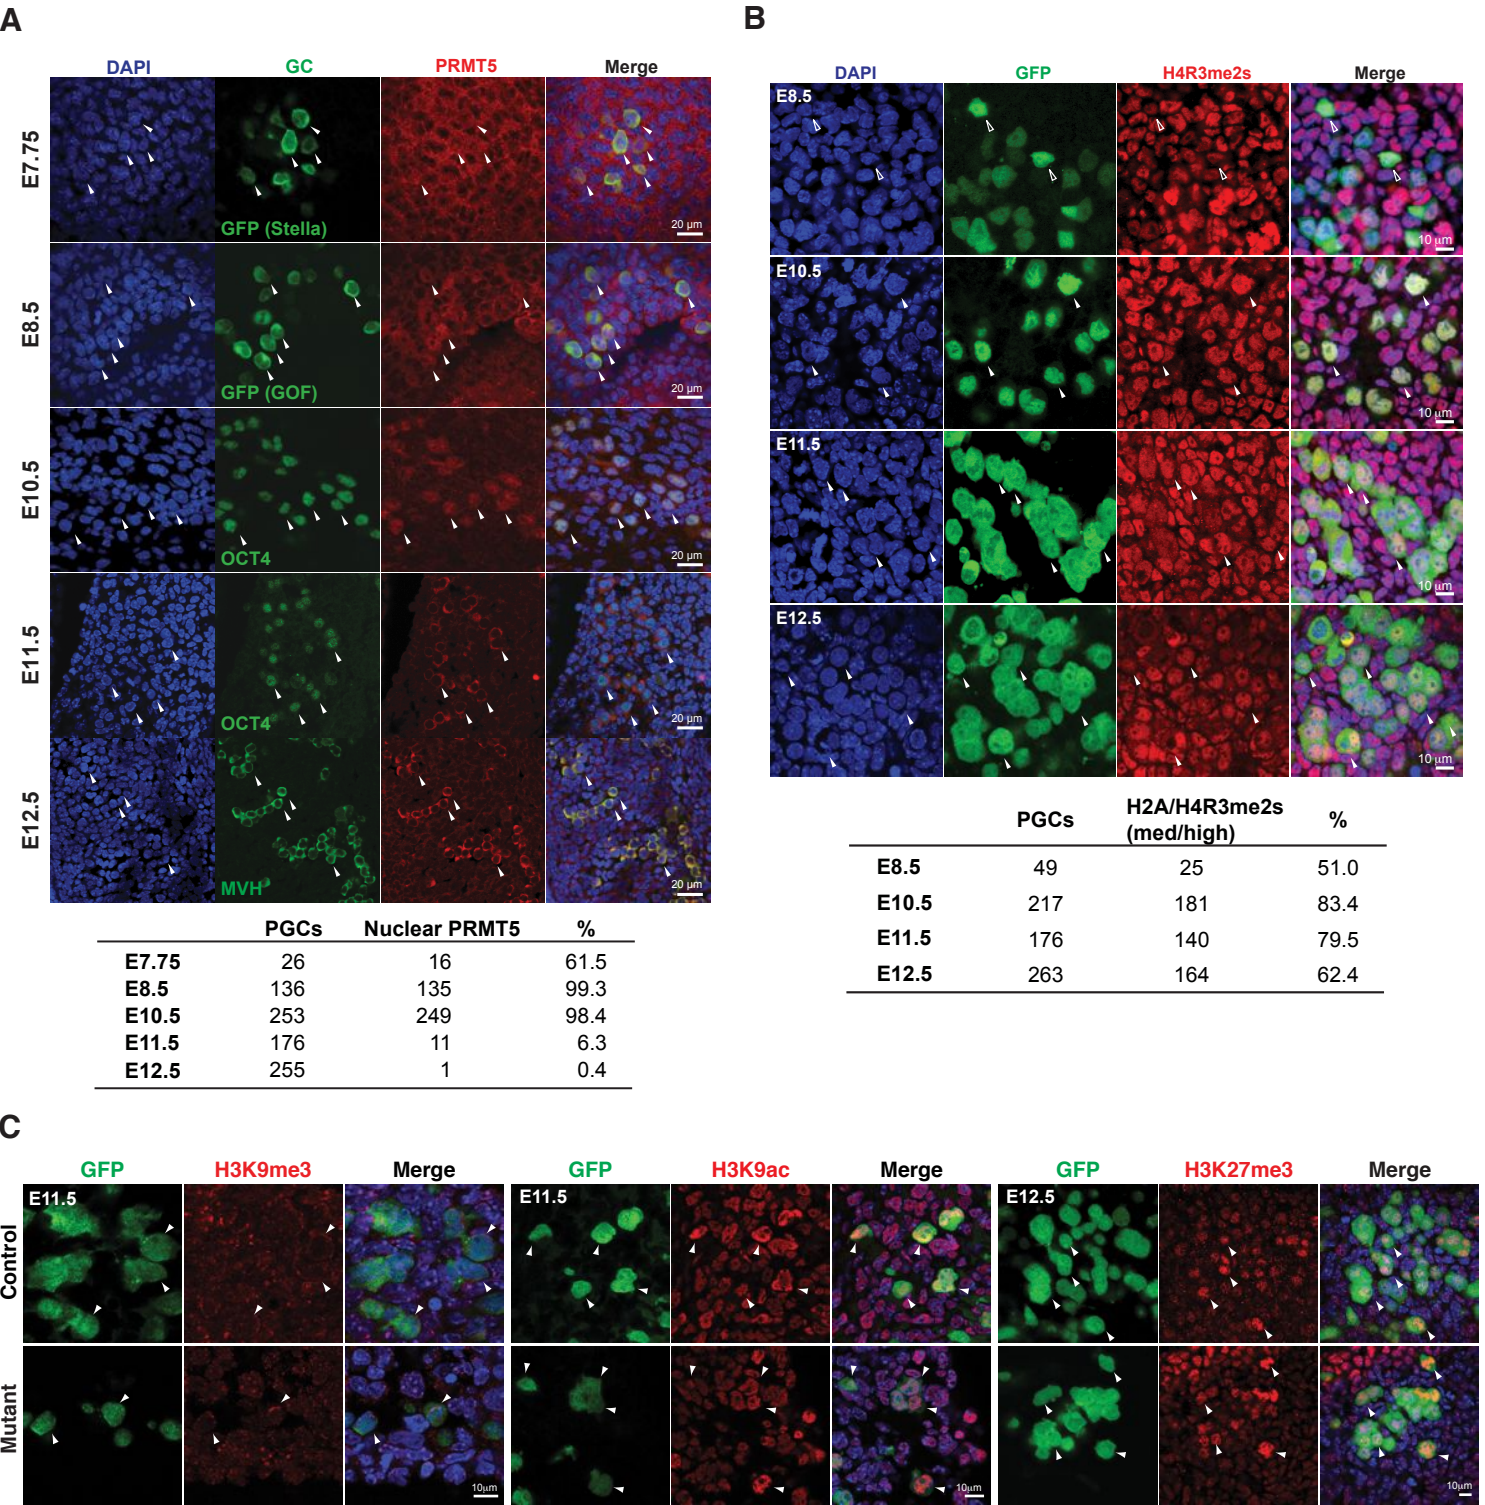

Figure S2 related to Figure 1 and 2

- (A) Immunofluorescence stainings for PRMT5 (red) and germ cell markers (as indicated; green) in PGCs (arrowheads) during development. Scale bar represents 20  $\mu\text{m}$ . Bottom table shows the number of PGCs (left), number of PGCs that has nuclear PRMT5 (middle) from each stage and the percentage of PGCs that shows nuclear PRMT5 (right).
- (B) Genital ridges from mice with the GOF transgene at E8.5 to E12.5 were stained for H2A/H4R3me2s (red) and GFP (green). The intensity of H2A/H4R3me2s in PGCs were categorized either as medium/high (filled arrowhead) or low (empty arrowhead) compared to the intensity of surrounding somatic cells. The table shows the number of counted GFP positive PGCs (left), the number of medium/high H2A/H4R3me2s PGCs (middle) and the percentage of PGCs that shows medium/high H2A/H4R3me2s (right).
- (C) Genital ridges from mice with the GOF transgene were stained for histone modifications (red) and GFP (green) in genital ridges. Stages are indicated and arrowheads show PGCs. Scale bar: 10  $\mu\text{m}$ .

Figure S3

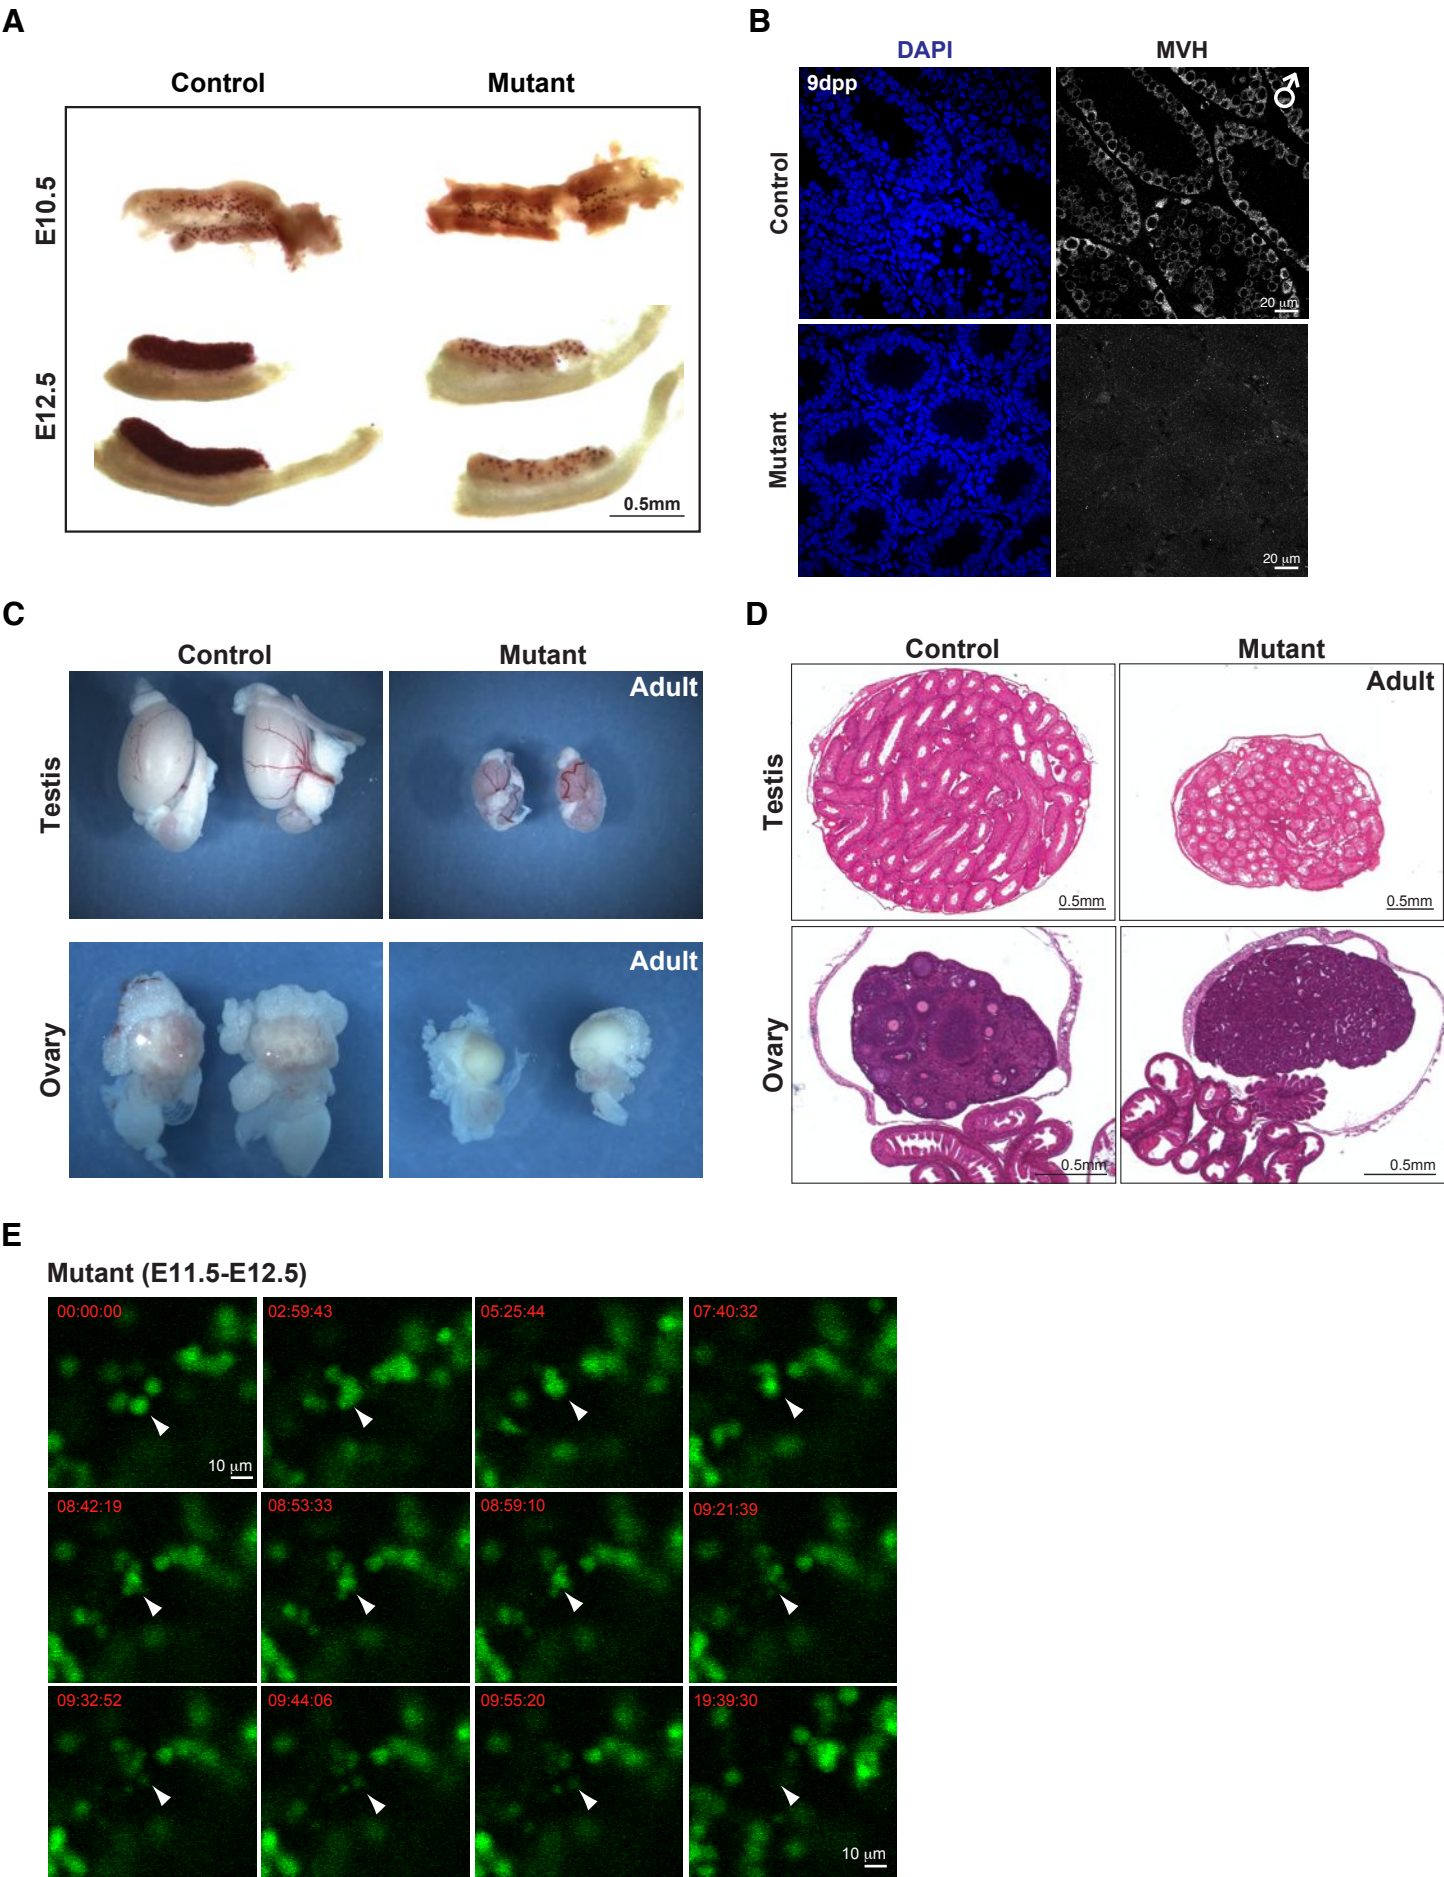

Figure S3 related with Figure 3.

(A) Alkaline phosphatase (AP) staining of genital ridges at E10.5 and E12.5 female.

Brown spots indicate AP positive PGCs.

(B) Postnatal day 9 testes were collected and stained for MVH (white) and DAPI (blue).

(C) Adult testis and ovary from control (left) and mutant (right) mice.

(D) Lack of germ cells in mutant adults is shown in hematoxylin and eosin (HnE) stainings of sections from testis and ovary.

(E) Captured images of mutant germ cells during live-imaging. E11.5 genital ridges with a GOF transgenes were imaged *ex-vivo* for 21 hours. Arrowhead indicates mutant PGCs that underwent fragmentation from ~9 hour after imaging. Scale bar, 10  $\mu$ m. See also Movie S1 (Mutant) and S2 (Control).

Figure S4

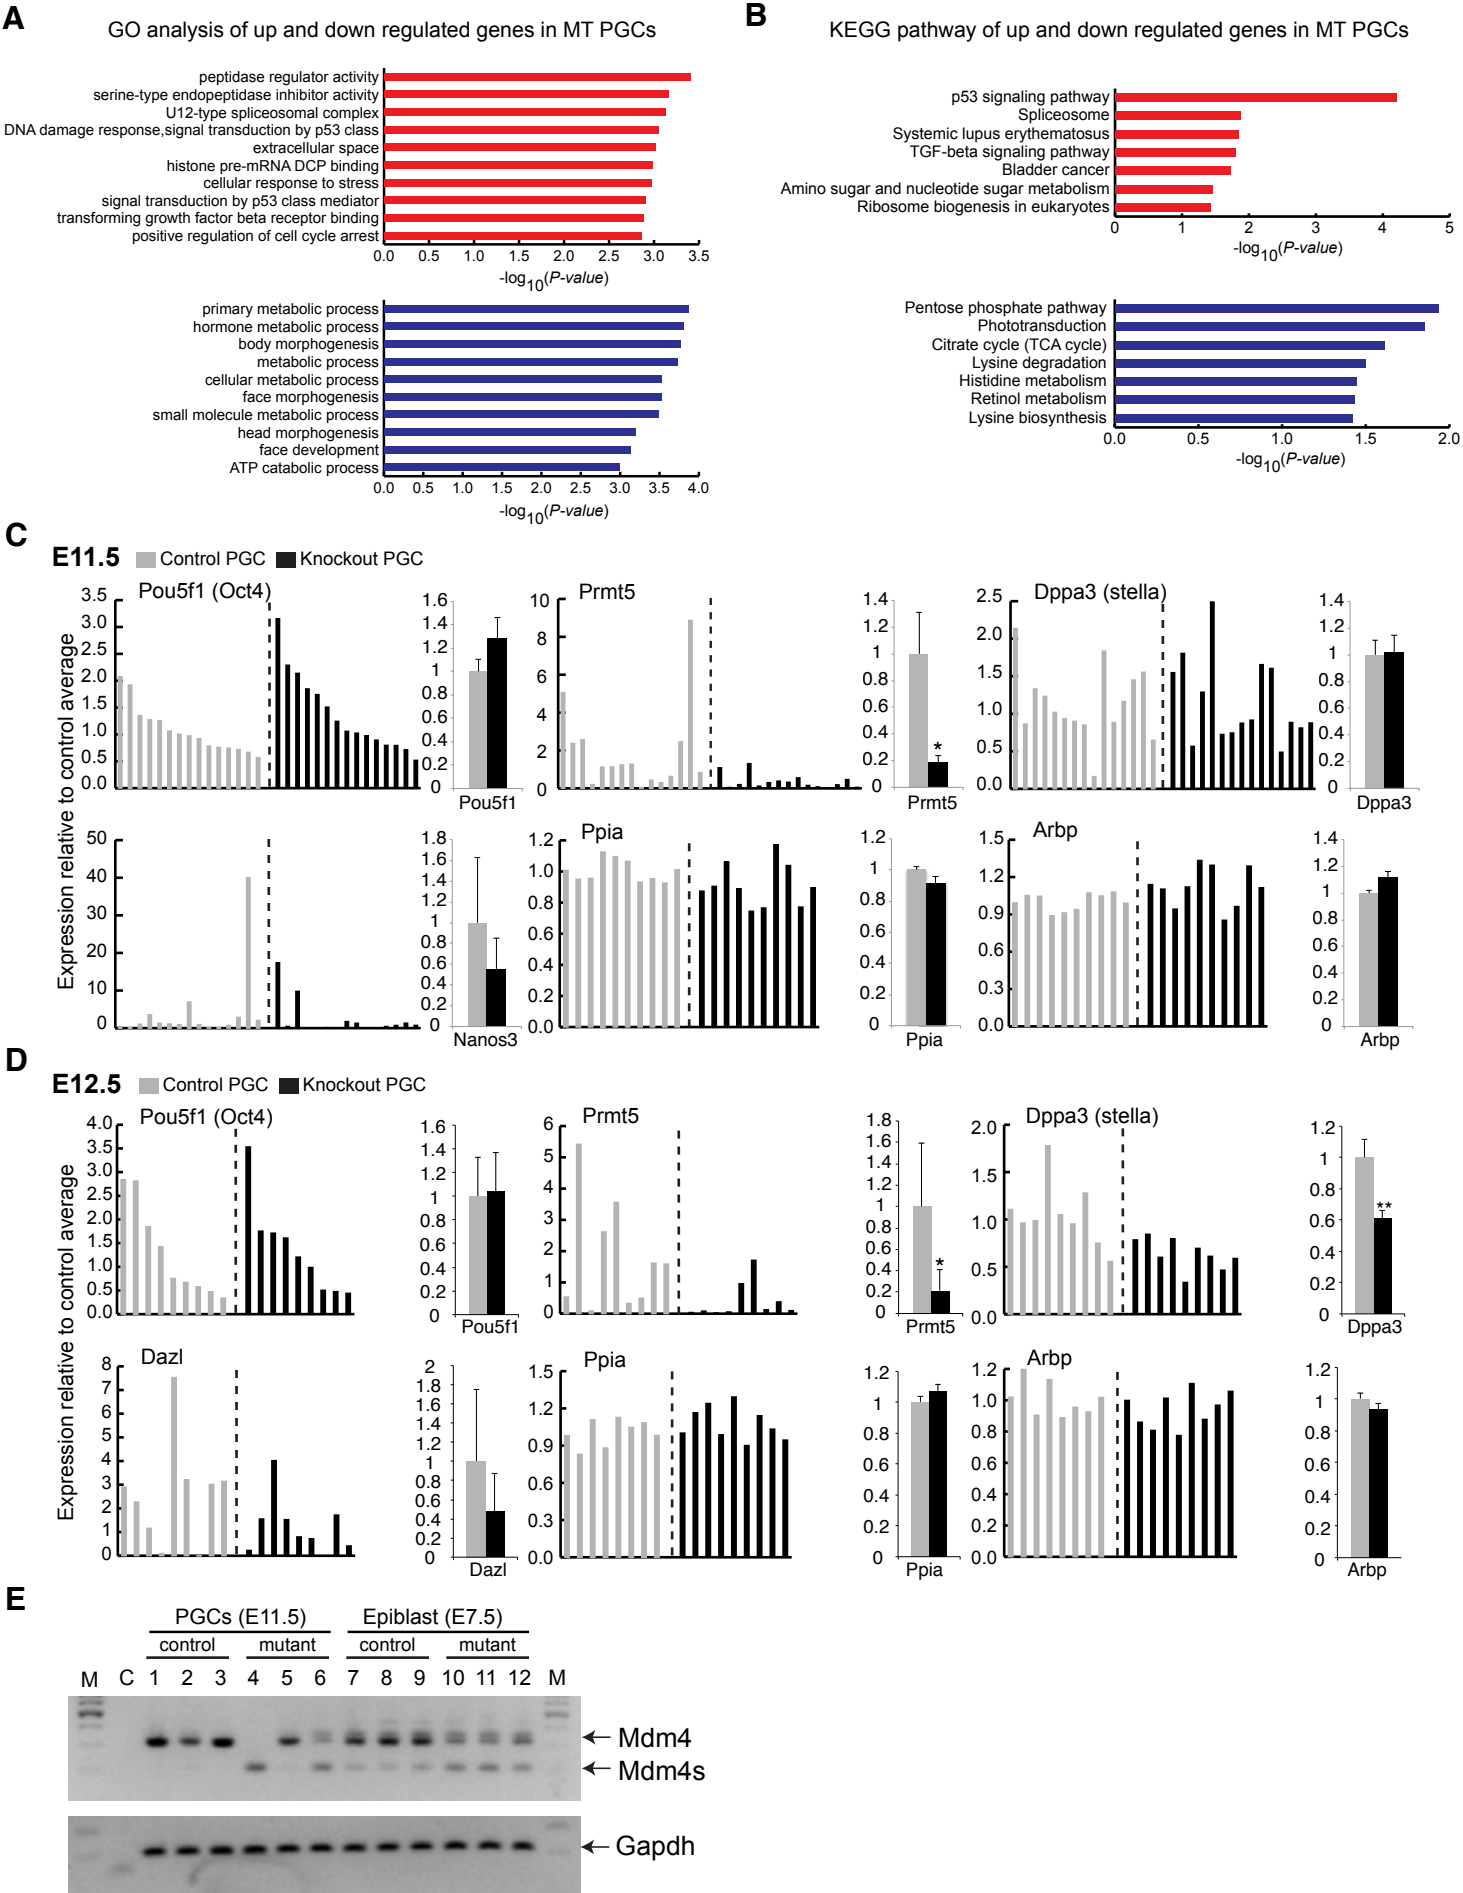

Figure S4 related to Figure 4.

(A) Gene Ontology (GO) analysis based on the RNA-seq data shows up (red) and down (blue) regulated genes in mutant (MT) PGCs.

(B) Analysis using the Kyoto Encyclopedia of Genes and Genomes (KEGG) shows up (red) and down (blue) regulated pathways in mutant (MT) PGCs.

(C and D) qRT-PCR analysis of selected genes in PGCs at E11.5 (C) and E12.5 (D).

E12.5 PGCs are from male. Gene expression levels relative to the average of controls are shown. Each sample was ordered according to the level of *Pou5f1* (Oct4), which values were normalized to *Gapdh*. Transcript levels are shown for PGC genes and two housekeeping genes (*Arbp*, *Ppia*). Right graph shows the average gene expression values  $\pm$  SE of all cells.

(E) Semi-quantitative PCR of the skipped exon on the *Mdm4* in PGCs and post-implantation epiblast (E7.5) using previously reported primer set (Bezzi et al., 2013). Mdm4s indicates the short form of *Mdm4* with skipped exon7. Mdm4s band become comparable to wild type full length Mdm4 band upon loss of PRMT5 in PGCs and the E7.5 epiblasts. Housekeeping gene *Gapdh* was used as a loading control.

See also TableS2.

Figure S5

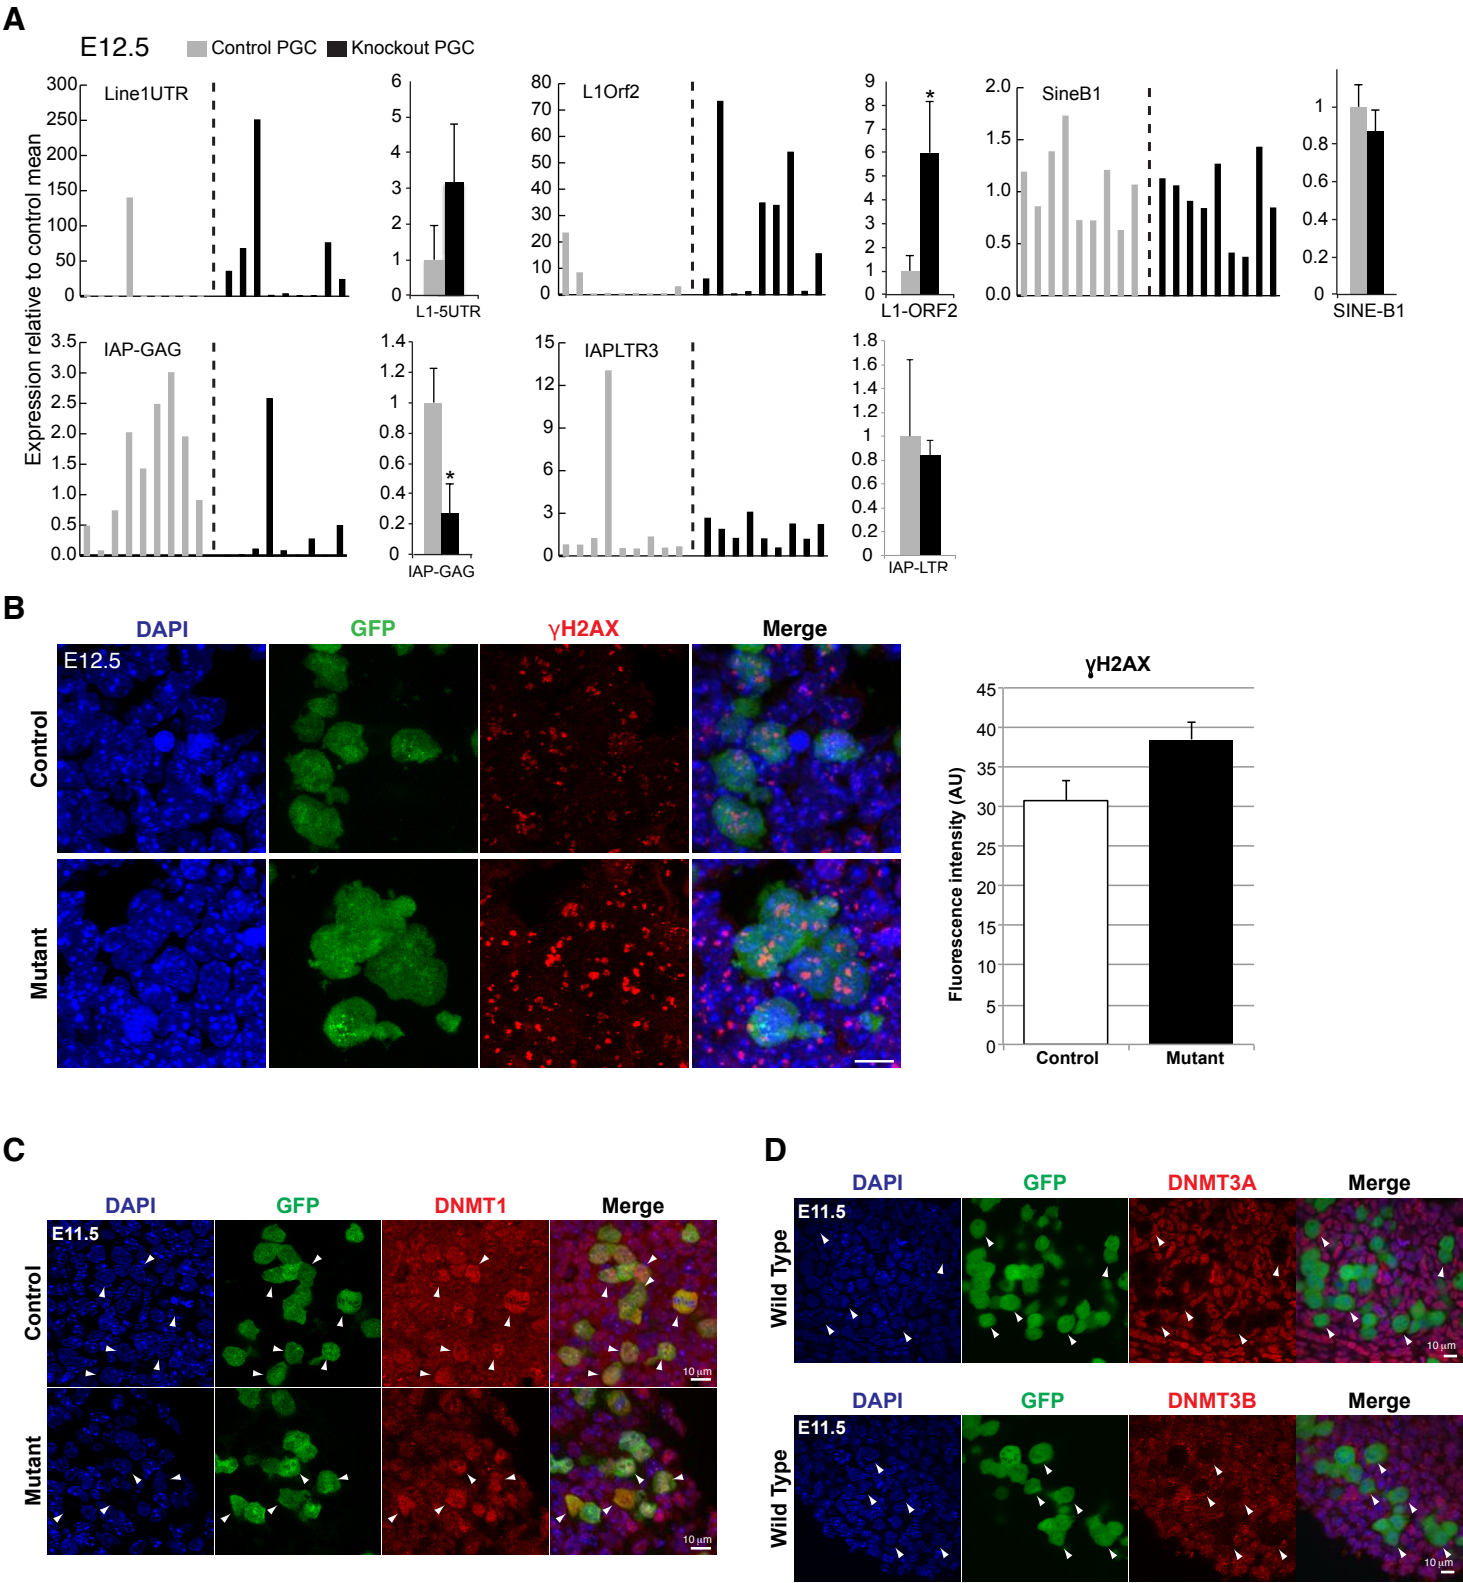

Figure S5 related to Figure 5.

- (A) Single cell qPCR analysis of indicated TEs in male PGCs at E12.5. Each bar represents one cell. Chart on the right shows the average mean values  $\pm$  SE of all cells. Significance was tested by Student's t-test: \*  $p < 0.05$
- (B) Immunofluorescence staining of  $\gamma$ H2AX (red) in female genital ridges at E12.5. The quantification shows the mean fluorescence intensity  $\pm$  SE in GFP positive area (PGCs). Scale bars, 10  $\mu$ m.
- (C) Immunofluorescence staining of DNMT1 (red) in genital ridges at E11.5. Arrowheads indicate PGCs. Scale bars, 10  $\mu$ m.
- (D) Immunofluorescence staining of DNMT3A or DNMT3B (red) in wildtype genital ridges at E11.5. Arrowheads indicate PGCs. Scale bars, 10  $\mu$ m.

Figure S6

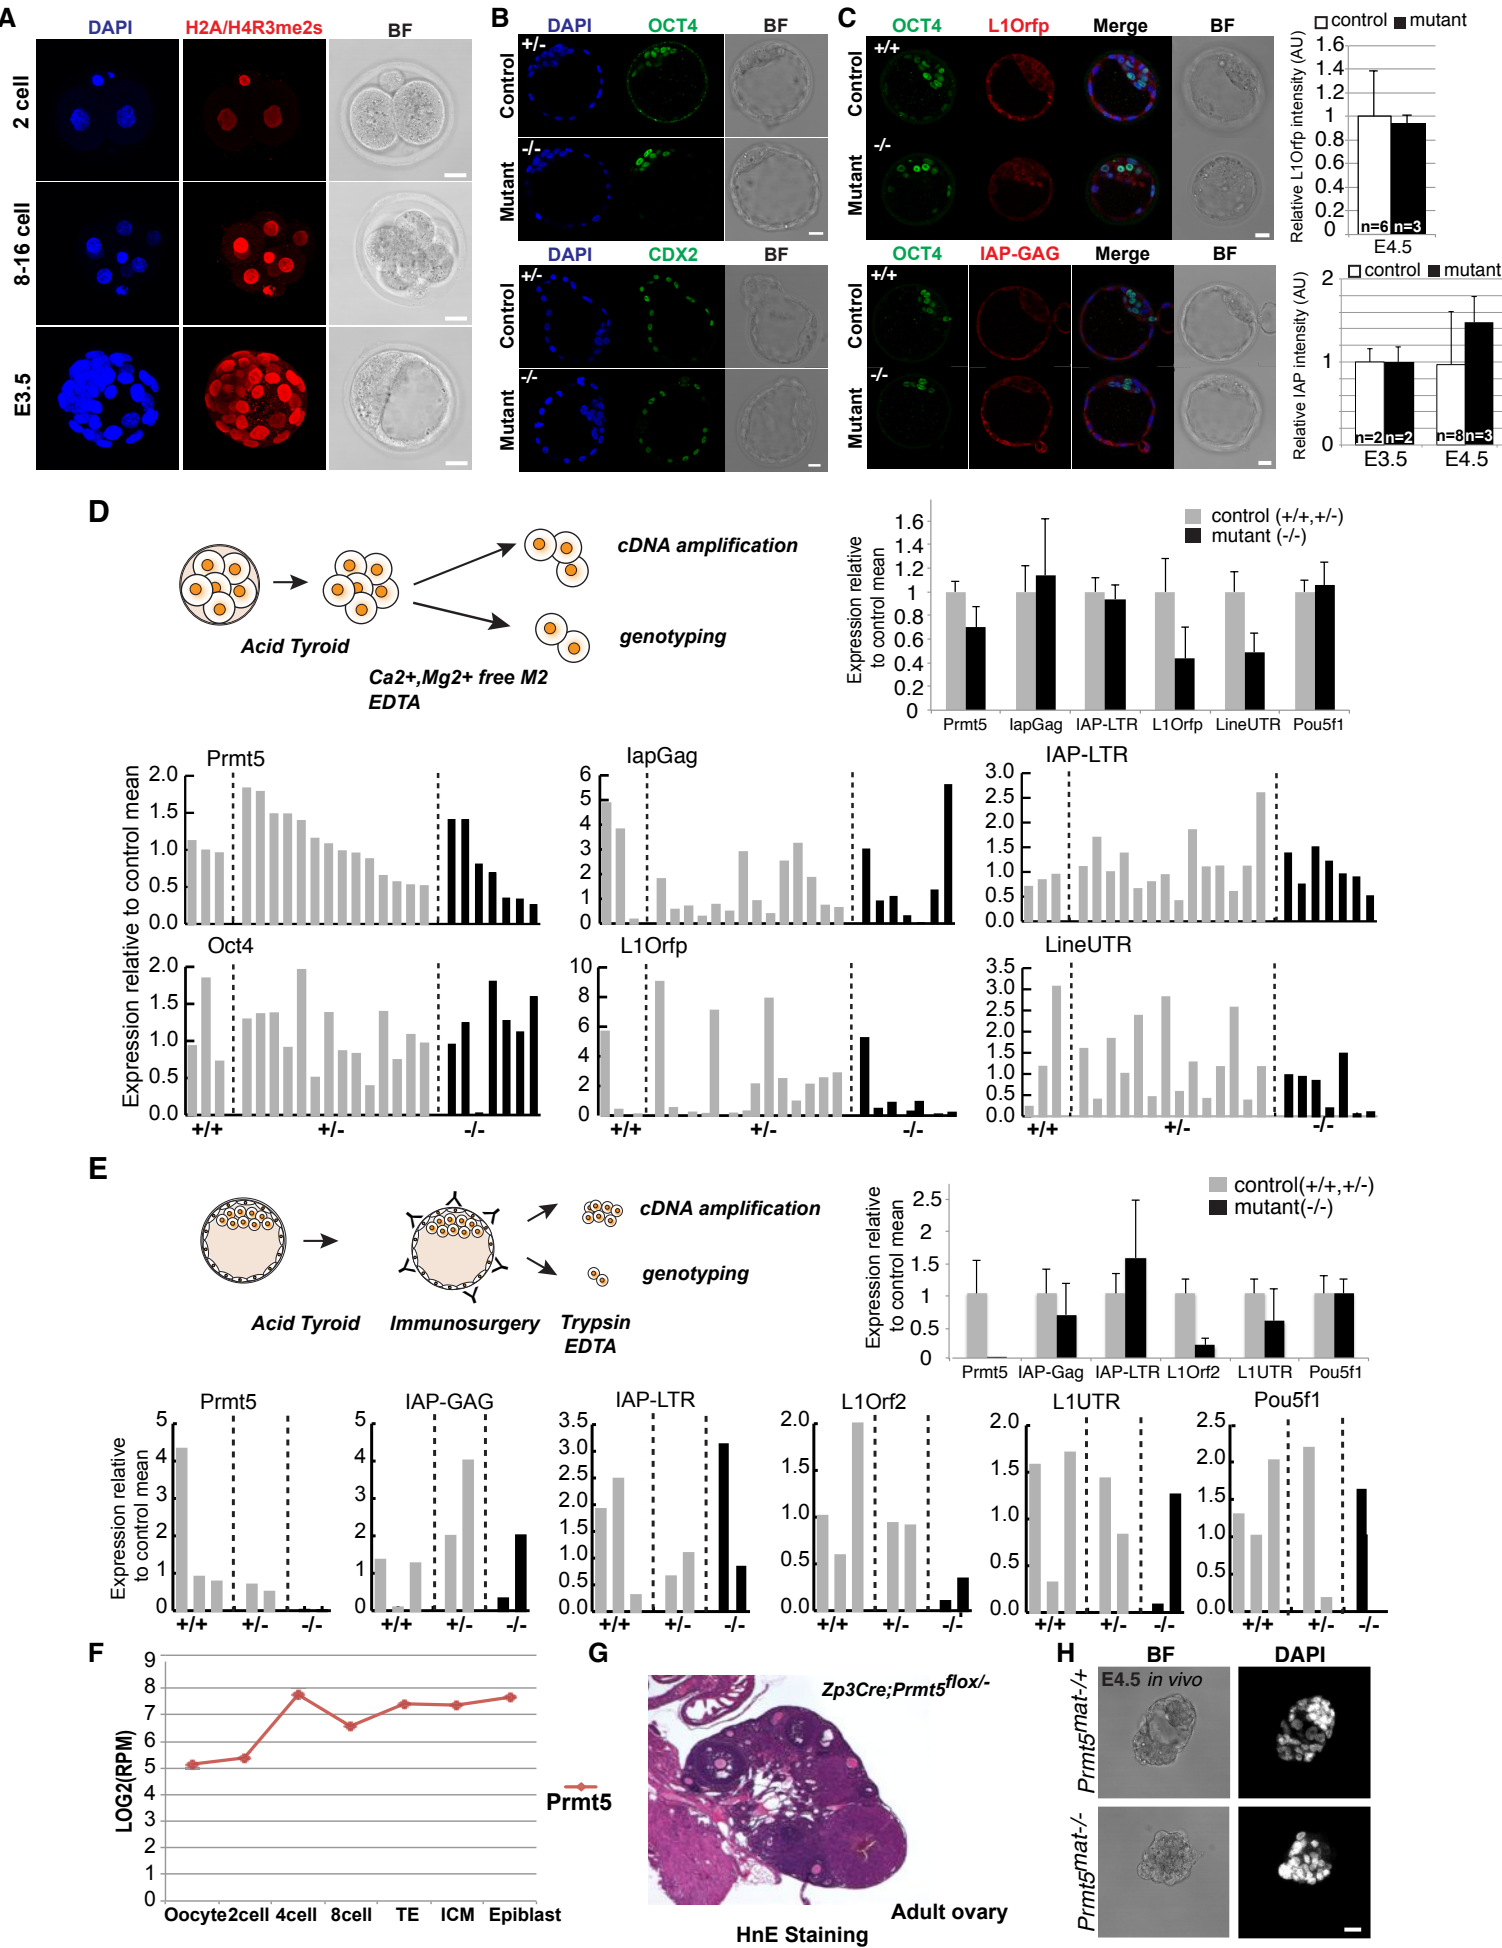

Figure S6 related to Figure 6.

- (A) Immunofluorescence staining for H2A/H4R3me2s (red) in wild type 2-cell to blastocyst stage preimplantation embryos (stages are indicated). Scale bars, 20  $\mu$ m.
- (B) Immunofluorescent staining for OCT4 (top panel; green) or CDX2 (bottom panel; green) in *Prmt5* heterozygous (+/-) and null (-/-) preimplantation embryos (E4.5).
- (C) Immunofluorescent staining of E4.5 control (+/+) and *Prmt5* mutant (-/-; zygotic *Prmt5* null) embryos for L1Orfp (top panel; red), IAP-GAG (bottom panel; red) and OCT4 (green) antibody. The quantification shows the relative fluorescence intensity +/- SD (n=number of embryos), which was measured from 10 z-sections (increment: 4  $\mu$ m). Bottom panel: Immunofluorescence staining with IAP-GAG (red) at E4.5 embryos.
- (D and E) Schematic diagram showing the experimental scheme for cDNA amplification from preimplantation embryos. From each embryo, two blastomeres were used for genotyping and the rest was used for cDNA amplification. qPCR analysis for indicated genes and TEs using cDNAs from control (+/+), *Prmt5* heterozygous (+/-) and *Prmt5* mutant (-/-; zygotic *Prmt5* null) embryos at E2.5 (D) and E4.5 (E) is shown. Each bar corresponds to one single embryo. Each sample was ranked in order of the level of *Prmt5* expression. Average expression +/- SE is shown in the top right graph.
- (F) Single cell RNA-seq analysis of *Prmt5* in oocyte and preimplantation embryos. Values are shown in log 2 reads per million (RPM).
- (G) Hematoxylin and Eosin staining of ovary sections from adult maternal *Prmt* knockout mice (*Zp3Cre;Prmt5<sup>flox/-</sup>*).

(H) A representative bright field (BF) and DAPI staining image of control (*Prmt5*<sup>mat-/+</sup>) and mutant (*Prmt5*<sup>mat-/-</sup>) embryo at E4.5 *in vivo*. Note that the mutant embryo does not form a blastocoel and looks morphologically abnormal.

**Figure S7**

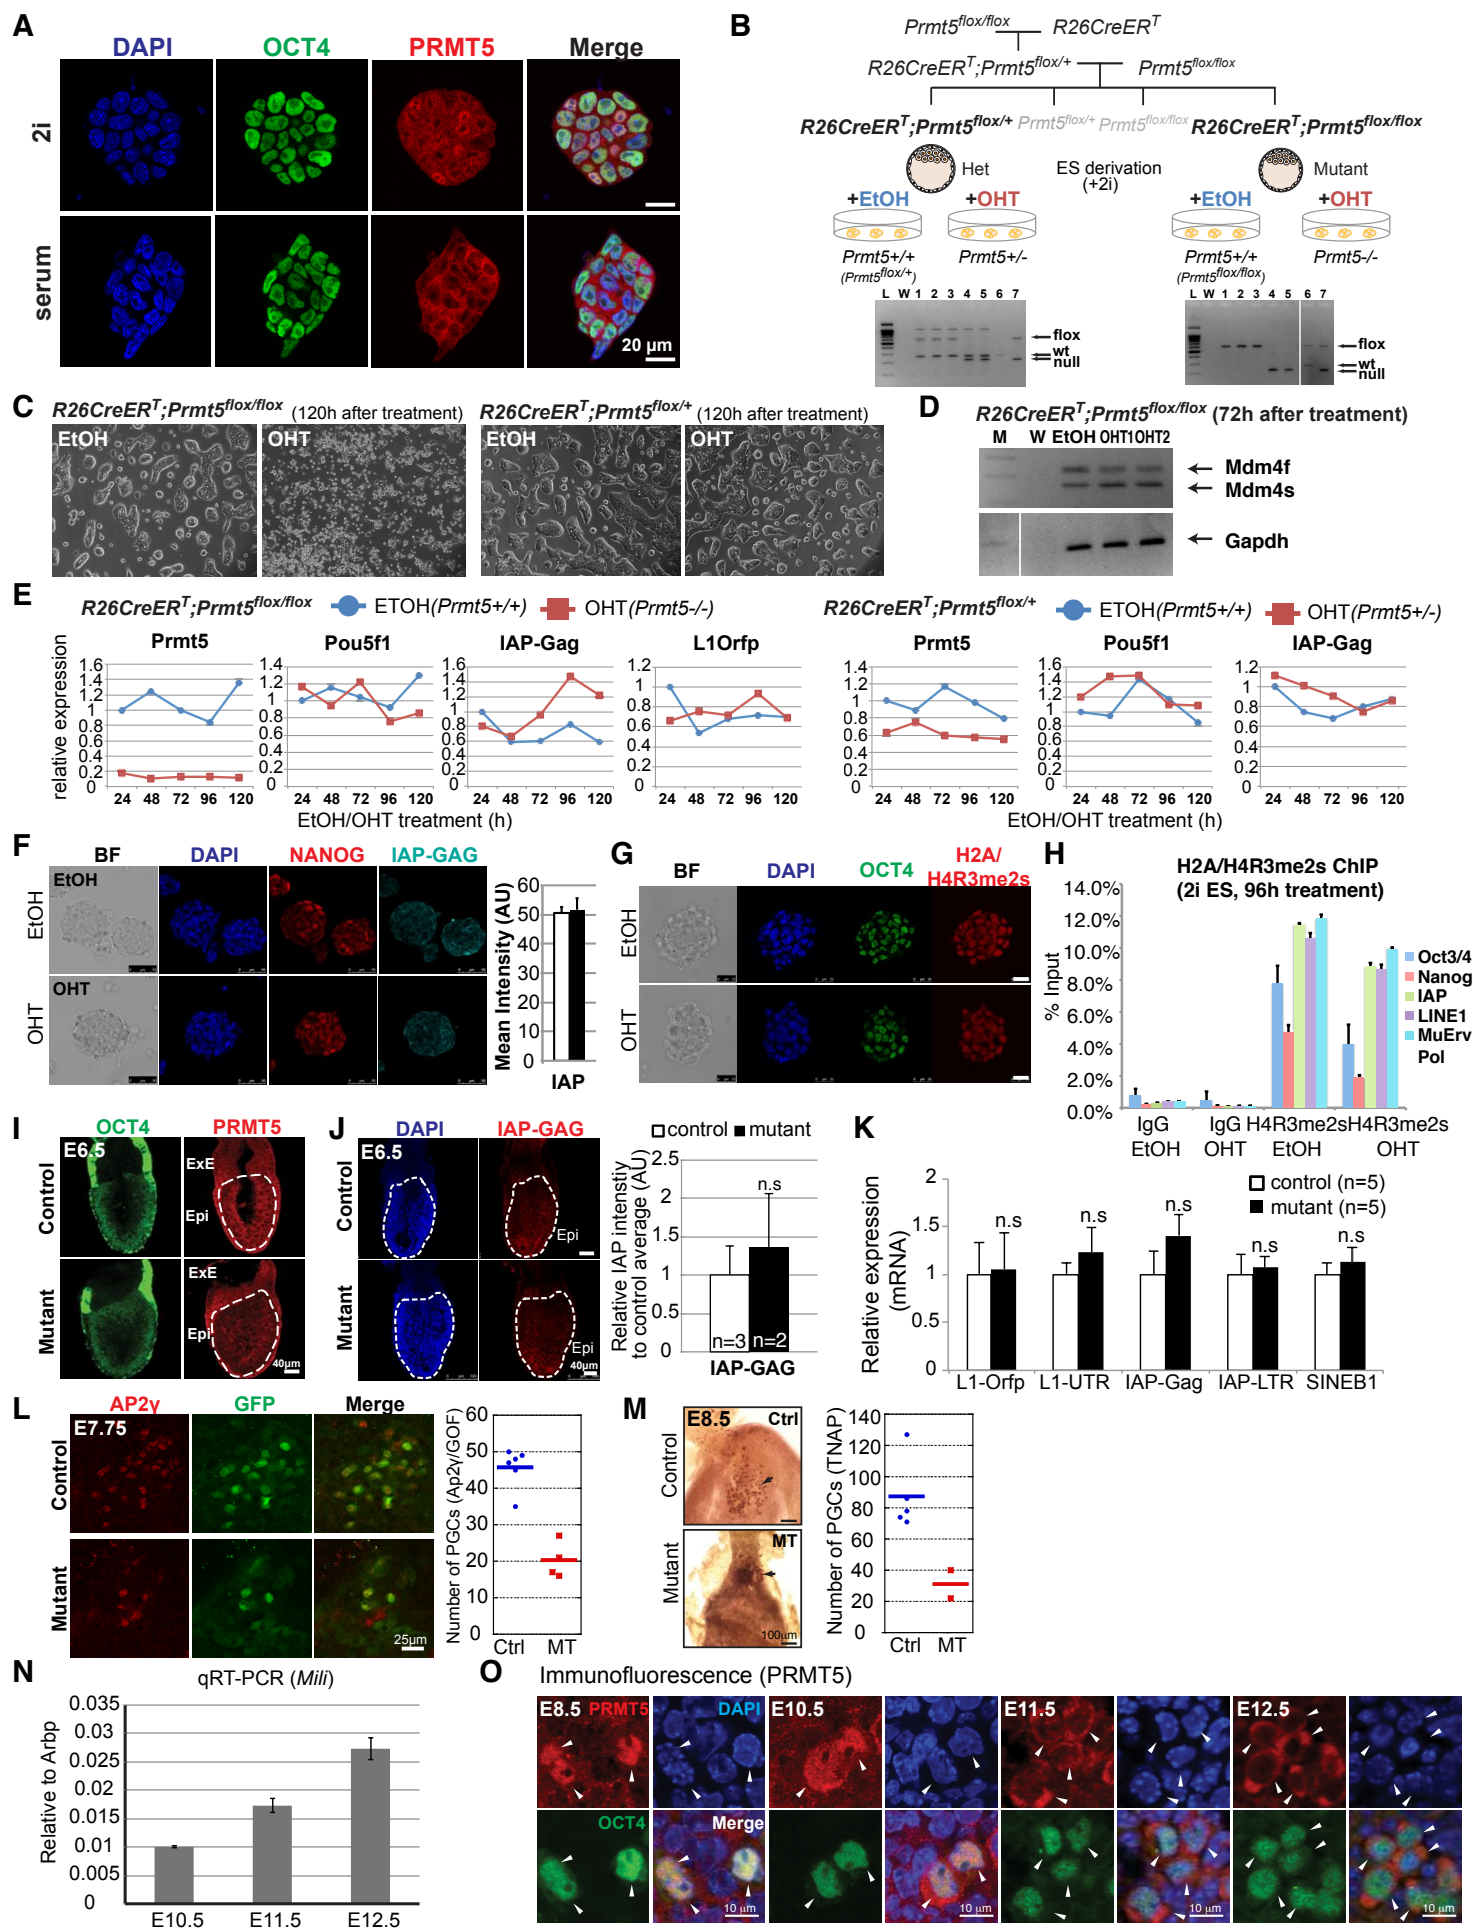

Figure S7 related to Figure 6 and 7

- (A) A representative image of wild type ES cells grown in 2i (upper panel) and serum (bottom panel). PRMT5 (red), OCT4 (green) immunofluorescence staining is shown. Note that there is heterogeneous nuclear localization of PRMT5 in '2i' cultured ES cells.
- (B) Top panel: Schematic diagram of the derivation protocol of inducible *Prmt5* knockout ES cells. *R26Cre;Prmt5<sup>flox/+</sup>* (het) and *R26Cre;Prmt5<sup>flox/flox</sup>* (conditional null) are shown. Each ES cell line was derived in 2i and cultured with 2i and EtOH or OHT. Bottom panel: genotyping result of induced *Prmt5* excision. Lane L: DNA ladder, lane W: water, lane 1: no treatment (0h), 2: no treatment (24h), 3: EtOH (24h), 4: 50 nM OHT (24h), 5: 100 nM OHT (24h), 6: *Prmt5<sup>flox/+</sup>* control, 7: *Prmt5<sup>flox/-</sup>* control.
- (C) Bright field image of *R26CreER<sup>T</sup>;Prmt5<sup>flox/flox</sup>* cells 120 hour after EtOH or OHT treatment (left panel), and *R26CreER<sup>T</sup>;Prmt5<sup>flox/+</sup>* cells (right panel).
- (D) Semi-quantitative PCR of the skipped exon of the *Mdm4* in *R26CreER<sup>T</sup>;Prmt5<sup>flox/flox</sup>* cells 72h after EtOH or OHT treatment using previously reported primer set (Bezzi et al., 2013). M; DNA ladder, W; water, EtOH (72h), OHT-1; 50 nM OHT, OHT-2; 100 nM OHT. *Mdm4s* indicates the short form of *Mdm4* with skipped exon7. *Mdm4s* band become more prominent upon OHT treatment compared to EtOH treated control.
- (E) Time-course qRT-PCR for ES cells. After treatment with EtOH (control, blue) and OHT (experimental, red) for 24h, 48h, 72h, 96h, 120h are shown. Homozygous *R26CreER<sup>T</sup>;Prmt5<sup>flox/flox</sup>* line showed significant reduction in *Prmt5* whereas the heterozygous *R26CreER<sup>T</sup>;Prmt5<sup>flox/+</sup>* line showed about 40% reduction after OHT treatment. At 96h OHT treatment, IAP-Gag is slightly upregulated (~1.8 fold) compared to the IAP-Gag expression of 96h EtOH treated ES cells. Graphs are shown for the relative expression of 24h EtOH treated ES cells.
- (F) Immunofluorescence staining with IAP-GAG antibody in *R26CreER<sup>T</sup>;Prmt5<sup>flox/flox</sup>* ES cells after 96h EtOH (control, top panel) or OHT (mutant, bottom panel) treatment. Right graph shows mean intensity of IAP-GAG staining (n=3, for EtOH and OHT).
- (G) Immunofluorescence staining with an H2A/H4R3me2s antibody (red) in *R26CreER<sup>T</sup>;Prmt5<sup>flox/flox</sup>* ES cells after 96h EtOH (control, top panel) or OHT (mutant, bottom panel) treatment. Only some cells showed slightly lower staining but overall the levels were not significantly different between EtOH and OHT treated cells.

- (H) ChIP with *R26CreER<sup>T</sup>;Prmt5<sup>flox/flox</sup>* ES cells with 96h EtOH or OHT treatment using a H2A/H4R3me2s antibody and IgG, respectively. ChIP-qPCR results +/- SE are shown. The Oct4 and Nanog locus served as negative controls.
- (I) Immunofluorescence staining for epiblast marker OCT4 (green) and PRMT5 (red) in *Sox2Cre;Prmt5<sup>flox/+</sup>* and *Sox2Cre;Prmt5<sup>flox/-</sup>* embryos at E6.5. PRMT5 is deleted specifically in the epiblast (Epi) but not in the extraembryonic ectoderm (ExE). Dashed line indicates epiblast.
- (J) Immunofluorescence staining for IAP-GAG (red) in control (*Sox2Cre;Prmt5<sup>flox/+</sup>*) and mutant (*Sox2Cre;Prmt5<sup>flox/-</sup>*) embryos at E6.5. The epiblast (Epi) is indicated by the dashed line. The measured intensity of IAP-GAG in control and mutant embryos is not significantly different.
- (K) qRT-PCR analysis of TEs with epiblasts of E7.5 from control (*Sox2Cre;Prmt5<sup>flox/+</sup>*, white) and mutant (*Sox2Cre;Prmt5<sup>flox/-</sup>*, black). Shown are the mean values +/- SE. Control and mutant epiblasts do not show significant difference. Significance is shown by Student's t test, n.s : not significant  $p>0.05$ .
- (L) Immunofluorescence staining AP2γ (red) and GFP (green, Stella-GFP) of E7.75 embryos. Right graph shows the quantification of counted germ cells with AP2γ and GFP positive PGCs at E7.5 from control (*Sox2Cre;Prmt5<sup>flox/+</sup>;Stella-GFP*, n=6) and mutant (*Sox2Cre;Prmt5<sup>flox/-</sup>;Stella-GFP*, n=4) embryos.
- (M) AP staining of E8.5 control (*Sox2Cre;Prmt5<sup>flox/+</sup>*) and mutant (*Sox2Cre;Prmt5<sup>flox/-</sup>*) embryos. Arrow indicates AP positive PGCs. Right graph shows the quantification of the counted germ cells of control (n=5) and mutant (n=2) at E8.5.
- (N) qRT-PCR analysis of *Mili* by qRT-PCR. *Mili* expression was calculated relative to the expression of the housekeeping gene *Arbp*.
- (O) Immunofluorescence staining of PRMT5 (red) and OCT4 (green) in genital ridges from E8.5 to E12.5. White arrowheads indicate OCT4 positive PGCs. Scale bar, 10 μm.

#### **Table S1 related to Figure 4**

Microarray data with E11.5 female and male PGCs. List of up- and downregulated genes in female mutant PGCs (genotype: *Blimp1Cre;Prmt5<sup>flox/-</sup>;GOF*) compared to control (*Blimp1Cre;Prmt5<sup>flox/+</sup>;GOF*) are shown.

#### **Table S2 related to Figure 4**

List of differentially expressed genes of E11.5 female mutant PGCs (*Blimp1Cre;Prmt5<sup>flox/-</sup>;GOF*) compared with control (*Blimp1Cre;Prmt5<sup>flox/+</sup>;GOF*) from RNA-Seq analysis.

#### **Table S3 related to Figure 5**

List of repeats and their expressions of E11.5 female PGCs of mutants (*Blimp1Cre;Prmt5<sup>flox/-</sup>;GOF*) and control (*Blimp1Cre;Prmt5<sup>flox/+</sup>;GOF*) identified in the RNA-seq analysis.

*Tables S1-S3 are provided separately as Excel files.*

#### **Movie S1 related to Figure 3**

Time lapse imaging of E11.5 mutant (*Blimp1Cre;Prmt5<sup>flox/-</sup>;GOF*) genital ridges for 24h. Green fluorescent cells are *GOF* positive PGCs.

#### **Movie S2 related to Figure 3**

Time lapse imaging of E11.5 control (*Blimp1Cre;Prmt5<sup>flox/+</sup>;GOF*) genital ridges for 24h. Green fluorescent cells are *GOF* positive PGCs.

*Movie S1 and S2 are provided separately as Mov files.*

### **Supplemental Experimental Procedure**

**Targeted disruption of *Prmt5* locus and generation of cell type-specific *Prmt5* knockout mice**

The *Prmt5* targeting vector was constructed by the following scheme: *Pgk-neo* flanked by *frt* site and the 5' *loxP* site, we inserted, the sixth intron of *Prmt5*. 3' *loxP* site to PGK-neo cassette was inserted into the seventh intron of *Prmt5* (Figure S1). The targeting vector was linearized and electroporated into E14Tg2a ES cells (129/Ola) and selection was performed with G418 (Invitrogen). The homologous recombinants were identified from G418-resistant colonies by PCR and a single integration site was confirmed by Southern hybridization by use of a 5' and 3' DNA probes. We obtained one ES cell clone with successful gene targeting, which, upon injection into C57BL/6 blastocysts, generated high contribution chimera with germline transmission. The germline transmitted *Prmt5* targeted mice were bred with *FlpE* mice to remove *Pgk-neo* cassette to get the floxed allele (*Prmt5<sup>flox</sup>*). The GOF reporter mice were bred with this *Prmt5<sup>flox</sup>* mice to generate *Prmt5<sup>flox/flox</sup>;GOF* to trace the germ cell lineage.

Cell type-specific *Prmt5* knockout mice were generated using Cre-mediated recombination of *loxP* sites in a functional *Prmt5* allele, *Prmt5<sup>floxed</sup>*. *Prmt5<sup>+/-</sup>* animals (129/Ola and C57BL/6 mixed background) were crossed with *B Lymphocyte Induced Maturation Protein 1 Cre (Blimp1-Cre)* animals expressing Cre in primordial germ cells (PGCs) (Ohinata et al., 2005). *Prmt5<sup>flox/flox</sup>* animals (female) were crossed with *Blimp1-Cre*; *Prmt5<sup>+/-</sup>* animals to produce *Prmt5* germ cell knockout mutants (*Blimp1Cre;Prmt5<sup>flox/-</sup>*). As controls, we used *Prmt5<sup>flox/-</sup>*, *Prmt5<sup>flox/+</sup>*, or *Blimp1Cre;Prmt5<sup>flox/+</sup>* littermates. For *Prmt5* epiblast knockout, we used Sox2 promoter driven *Cre* mice (Hayashi et.al, 2002) expressing Cre in early epiblast cells.

All husbandry and experiments involving mice were carried out according to the local ethics committee and were performed in a facility designated by the Home Office.

### **Histological analysis**

Dissected testes were fixed in Bouin's fixative or phosphate buffered formalin overnight at 4 C, progressively dehydrated in a graded ethanol series and embedded in paraffin wax. Sections (6-7  $\mu\text{m}$ ) were deparaffinized, rehydrated, and stained with hematoxylin and eosin.

### **Time lapse imaging**

E11.5 gonads were cultured *ex vivo* as previously described (Martineau et al. 1997) with some deviations. 1.5% agar (in DMEM) was poured in 35mm glass bottom culture dishes (MatTek) with a thin glass capillary in the center to generate a small groove. One mutant and one control gonad were placed into the groove and covered with medium containing DMEM/10% FCS/Penicillin (10000U/ml)/ Streptomycin (10mg/ml). Mutant and control gonads were imaged simultaneously using a Zeiss LSM 510 Meta confocal microscope (512x512, 5 minutes interval, 37 Z-sections, 223 frames) for ~24h at 37C and 5% CO<sub>2</sub>. Movies and cell count data were generated using the Volocity 3D image analysis software (PerkinElmer).

### **Single-cell cDNA library preparation**

For isolation of PGCs, genital ridges of embryos from timed crosses of mice bearing a GOF reporter were dissected and single PGCs from individual genotyped embryos sorted by GFP for GOF transgene or SSEA1 positive cells using a MoFlo MLS high-speed flow sorter (Beckman Coulter). For the RNA-seq analysis 50 pg of total RNAs of purified PGCs from control and mutant embryos were used to generate cDNA library. Generation of cDNA library and subsequent amplification were performed as described by Tang et al (Tang et al., 2010).

### **Quantitative real-time PCR and gene expression analysis**

RNA was extracted using the Picopure kit (Life Technologies) and cDNA was synthesized using Superscript III reverse transcriptase (Life Technologies). All quantitative PCR runs were performed and analysed as detailed previously (Grabole et

al., 2013). Relative expression levels of single cell cDNA library was normalized with housekeeping genes (*Gapdh*, *Arbp* or *Ppia*) and analysed as previously described (Livak and Schmittgen, 2001).

### **Generation of maternal PRMT5 deleted zygotes**

The *Prmt5*<sup>flox/flox</sup> mice were mated with Zp3-Cre transgenic mice, which express Cre recombinase under the control of the Zona pellucida glycoprotein 3 promoter (de Vries et al., 2000). Then the *Zp3-Cre;Prmt5*<sup>flox/+</sup> female mice were mated with *Prmt5*<sup>flox/flox</sup> male mice. From this mating we obtained *Zp3Cre;Prmt5*<sup>flox/-</sup> mice and following the deletion of the floxed allele in the oocyte, we generate oocytes that are the null mutants for maternal PRMT5.

### **Isolation of preimplantation embryos and immunostaining**

The morulae were flushed out from the oviduct at E2.5 from *Zp3Cre;Prmt5*<sup>flox/-</sup> females mated with *Prmt5*<sup>+/-</sup> males and cultured for 2 days in M16 medium. The developed blastocysts were fixed in 2% PFA followed by immunostaining.

After all images were acquired with confocal microscope, each embryo was retrieved and genotyped to identify control and mutant.

### **Whole Mount Alkaline Phosphatase Staining of Embryos**

Embryos were dissected in PBS, fixed in 4% (w/v) paraformaldehyde (PFA) in PBS for 2 h at 4 °C, washed twice in PBS, and then incubated in freshly prepared alkaline phosphatase (AP)-staining solution, i.e., 250 mM Tris-maleic acid, pH 9, 0.1 mg/ml 1-Naphthyl phosphate, disodium salt (Sigma N7255), and 0.5 mg/ml Fast Red TR salt (Sigma F6760), for 15 min in the dark. Embryos were cleared in 40% glycerol for 1 h and 80% glycerol overnight at 4 °C.

### **Wholemout immunofluorescence staining**

Embryos from timed mating were dissected and processed for immunostaining as described previously (Seki et al., 2007). Images were acquired using confocal

microscope (Olympus, Leica) and analyzed with ImageJ software. Primary antibodies used were as follows: anti-PRMT5 (Millipore, 07-405, 1:500), anti-H2A/H4R3me2s (Abcam, ab5823, 1:800) anti-GFP (Nacalia Tesque, GF090R, 1:500), anti-OCT-3/4 (BD transduction Laboratories, 1:200), anti-MVH (R&D systems, AF2030, 1:500), anti-CDX2 (Biogenex, 1:200), anti-DNMT3a (IMGENEX, IMG-268A, 1:200), anti DNMT3b (IMGENEX, IMG-184A, 1:200), anti-Ki67 (BD Bioscience, 550609, 1:200), anti-γH2AX (Millipore, 05-636, 1:500), anti-LINE1 Orf1p (gift from Alex Bortvin, 1:1000), anti-IAP-GAG (gift from Bryan R. Cullen, 1:2000).

### **Cryosections**

Genital ridges were dissected and fixed in 4% PFA for 1h at room temperature and washed several times with PBS, and then transferred into 10% sucrose/PBS (2h), 20% sucrose/PBS (2h) and finally into OCT (overnight). Next day, the tissues were embedded in OCT in tissue molds and frozen at -80 °C. The OCT blocks containing the tissues were cut into 8µm thick sections using a Leica Cryostat CM3050S and collected on SuperFrost Plus slides (VWR). For immunofluorescence staining, cryosections were washed with PBS and permeabilized in PBS/1%BSA/0.1%Triton X-100 before incubation with primary antibodies in permeabilization buffer over night at 4 °C. Next day, cryosections were washed several times with PBS, incubated with secondary antibodies in permeabilization buffer for 2h at room temperature, washed several times with PBS, incubated with DAPI in PBS for 15 minutes and mounted using Vectashield Mounting Medium (VECTOR Labs). Imaging was performed using a Leica SP5 confocal microscope.

### **TUNEL assay**

The TUNEL assay was performed on cryosections using the 'In Situ Cell Death Detection Kit, TMR red' from Roche according to manufacturer's instructions. Briefly, cryosections on slides were first permeabilized with PBS/1%BSA/0.1% Triton X-100,

then incubated with the TUNEL Reaction Mixture for 30 minutes at 37C, washed several times with PBS, which was then followed by immunofluorescent staining as described in the 'cryosections' section.

### **RNA-seq analysis and repeat analysis**

For the RNA-seq analysis 50 pg of total RNAs of purified PGCs from control and mutant embryos were used to generate cDNA libraries. RNA-seq data was mapped with LifeScope version 2.5 on mm9 and read counts were generated for each transcript using NCBI RefSeq annotation. Differentially expressed genes were identified using the Bioconductor package DESeq (Anders & Huber, 2010). From an initial pool of 21358 genes, 11343 passed a minimum expression filter requiring a non-zero read count at least 1 sample. Of these, 422 genes were found to be differentially expressed. GO and KEGG terms overrepresented among the differentially expressed genes were identified using the Bioconductor package goseq (Young et al., 2010).

For repeat analysis, reads were aligned by using the BWA software (<http://bio-bwa.sourceforge.net/bwa.shtml>) and RepeatMasker annotations were downloaded from the UCSC browser (GRCm38/mm10). Unique read counts on repeat classes were normalized using the Bioconductor/DESeq package.

### **Bisulfite sequencing**

We isolated PGCs from dissected genital ridges of individual embryos with a GOF transgene by FACS sorting using a MoFlo 3 laser Cytometer (Beckman Coulter). The genomic DNA is prepared from each sample followed by genotyping and bisulfite sequencing. The bisulfite sequencing was performed as previously described (Hackett et al., 2012).

### **Chromatin immunoprecipitation q-PCR**

Low cell number Chip-qPCR was performed as previously described (Ng et al., 2013). Briefly FACS-purified PGCs were fixed in 1% formaldehyde (room temperature, 10 min),

quenched with 1 vol. 250 mM glycine (room temperature, 5 min), and rinsed with chilled TBSE buffer (20 mM Tris-HCl, 150 mM NaCl, 1 mM EDTA) twice before storage at  $-80^{\circ}\text{C}$ . After thawing on ice, fixed cells were pooled (22,000 cells per ChIP) and lysed with 100  $\mu\text{l}$  1% SDS Lysis Buffer (50mM Tris-HCl pH8, 10mM EDTA, 1% SDS, Roche protease inhibitor cocktail; on ice, 5 min) and then centrifuged (2,000 rpm, 10 min). Since pellet was not visible, supernatant was carefully removed such that  $\sim 10$   $\mu\text{l}$  remains. Samples were resuspended in 100  $\mu\text{l}$  of Dilution buffer (16.7mM Tris-HCl, pH8, 167mM NaCl, 1.2mM EDTA, 1.1% Triton X-100, 0.01% SDS, Roche protease inhibitor cocktail). Samples were sonicated 9 times (30 s pulses with 30 s break interval) using the Bioruptor water bath sonicator (Diagenode). Chromatin extracts were then precleared with Dynal Magnetic Beads (Invitrogen) ( $4^{\circ}\text{C}$ , 1 hr) followed by centrifugation (2,000 rpm, 30 min). Supernatant (precleared chromatin) was immunoprecipitated overnight with Dynal Magnetic Beads coupled with anti-H4R3me2s (1  $\mu\text{g}$  per ChIP, ab5823, Abcam) or normal rabbit serum. On the next day, beads were washed (nutate in dilution buffer for 5 min at  $4^{\circ}\text{C}$  thrice then once in TE buffer) and elution was performed in a PCR machine ( $68^{\circ}\text{C}$ , 10 min). After reverse crosslinking (with protease K at  $42^{\circ}\text{C}$  for 2 hr and  $68^{\circ}\text{C}$  for 6 hr) DNA was purified (phenol-chloroform extraction) and used for qPCR analysis.

### **Analysis of staining intensity**

For each analysis, images were taken using the same microscope settings and between control and mutant and analysed using ImageJ software. For analysis of blastocyst L1Orfp1 and IAP-GAG stainings, an intensity threshold (minimum:50, maximum:255) and a value of integrated density were used. Mean intensity of 10-Z sections (4  $\mu\text{m}$  increment) of each embryo was calculated.

For  $\gamma\text{H2AX}$  staining, Images (z stacks; increment: 1 $\mu\text{m}$ ) were acquired using a Leica SP5 confocal microscope. Maximum projections of image stacks were used for

quantification of mean fluorescence intensity in GFP positive cells as defined by the Otsu thresholding algorithm using ImageJ.

### **Blastocyst genotyping**

Nested PCR was used to determine the genotype of blastocysts obtained from a *Prmt5*<sup>+/-</sup> cross. Blastocysts were washed three times in PBS-BSA, transferred to PCR tubes containing 4.5 µl PBS-BSA. These were centrifuged briefly to collect embryos, heated for 10 min at 99°C, then centrifuged at 11,000 rpm for 1 min. Proteinase K (0.4 mg/ml) was added to the tubes and incubated 10 min at 55 °C, then at for 3 min at 99 °C to inactivate proteinase. Diagnostic regions were amplified from DNA in lysate (5 µl) by PCR using Taq polymerase (1U, Qiagen) and PM5OutF, Pm5OutR and Pm5Exon7R primers (0.2 µM, each). PCR product (1 µl) was used for the 2<sup>nd</sup> PCR, with PM5Flp03F, PMSC6R and PM5DelinR1 primers. Final PCR product was resolved by agarose gel electrophoresis (2% agarose), to determine the presence of 210 bp (*Prmt5*<sup>-/-</sup>) and/or 260 bp (*Prmt5*<sup>+/+</sup>) bands.

### **Semiquantitative RT-PCR for splicing defects**

PCR for skipped exon of Mdm4 were performed using previously reported method (Bezzi et al., 2013). cDNA of PGCs and epiblasts from individual embryos were used as a template.

### **Primer sequence**

Probe (for Southern analysis)

PR1AF: AAAGGGACGCACAGTCATTC

PR1AR: GCACCAATTTCTTCCCAAAA

PR2F: TTATCCCAGCACTCCAGAGG

PR2R: AAACAGGCAGGCAGAAAGAA

Genotyping

PGK5: AAAGCGCATGCTCCAGACTGCCTTG

PMSC6R: TACCCAGCTCACACATGGAA  
Seq5F: AGGCAGGAGGATCAGGAGTT  
PMSC1: ATTAAGGGCCAGCTCATTCC  
PM5Flp01F: CTGGGGGTGTAGCTCAGTTG  
PM5KO1F: CTGCACACACATGGCACATA  
PM5KO2R: GTCCTGGTTGTGGGAGCTTA  
PM5OutF: TGAAGCCCCTAAGTAGATCC  
PM5OutR: TTCTCAGCTTTCTGGATGAA  
PM5Exon7R: AGCCTCTGCTGCACCTTAGA  
PM5Flp03F: GCCTGCAGTTCCACCTCTTA  
PM5DelinR1: GGGCACAAGGACCCTCAACT  
Splicing (skipped exon) for Mdm4  
Mdm4sF: TGTGGTGGAGATCTTTTGGG  
Mdm4sR: TCAGTTCTTTTCTGGGATTGG

## **SUPPLEMENTAL REFERENCES**

Anders, S., and Huber, W. (2010). Differential expression analysis for sequence count data. *Genome Biol*, 11, R106.

Bezzi, M., Teo, S.X., Muller, J., Mok, W.C., Sahu, S.K., Vardy, L.A., Bonday, Z.Q., and Guccione, E. (2013). Regulation of constitutive and alternative splicing by PRMT5 reveals a role for Mdm4 pre-mRNA in sensing defects in the spliceosomal machinery. *Genes Dev.* 27, 1903-1916.

Grabole, N., Tischler, J., Hackett, J.A., Kim, S., Tang, F., Leitch, H.G., Magnúsdóttir, E., and Surani, M.A. (2013). Prdm14 promotes germline fate and naive pluripotency by repressing FGF signalling and DNA methylation. *EMBO Rep.* 14, 629-637.

Hackett, J. A., Sengupta, R., Zylitz, J. J., Murakami, K., Lee, C., Down, T. A., and Surani, M. A. (2013). Germline DNA Demethylation Dynamics and Imprint Erasure Through 5-Hydroxymethylcytosine. *Science* 25, 448-452.

Livak, K.J., and Schmittgen, T.D. (2001). Analysis of Relative Gene Expression Data

Using Real-Time Quantitative PCR and the  $2^{-\Delta\Delta CT}$  Method. *Methods* 25, 402–408.

Martineau, J., Nordqvist, K., Tilmann, C., Lovell-Badge, R., and Capel B. (1997). Male-specific cell migration into the developing gonad. *Curr Biol.* 7, 958-968.

Ng, J. H., Kumar, V., Muratani, M., Kraus, P., Yeo, J. C., Yaw, L. P., Xue, K., Lufkin, T., Prabhakar, S., and Ng, H.H. (2013). In Vivo epigenomic profiling of germ cells reveals germ cell molecular signatures. *Dev. Cell* 24, 324–333.

Seki, Y., Yamaji, M., Yabuta, Y., Sano, M., Shigeta, M., Matsui, Y., Saga, Y., Tachibana, M., Shinkai, Y., Saitou, M. (2007) Cellular dynamics associated with the genome-wide epigenetic reprogramming in migrating primordial germ cells in mice. *Development* 134 2627-2638.

Young, M. D., Wakefield, M. J., Smyth, G. K., and Oshlack, A. (2010). Gene ontology analysis for RNA-seq: accounting for selection bias. *Genome Biol.*, 11, R14.
